# Supplementary material for: Single Nucleotide Polymorphisms with Cis-Regulatory Effects on Long Non-Coding Transcripts in Human Primary Monocytes
Source: PubMed Central journal article supplement (PMC4099216; doi:10.1371/journal.pone.0102612), 2014-07-15

1 rs2501276

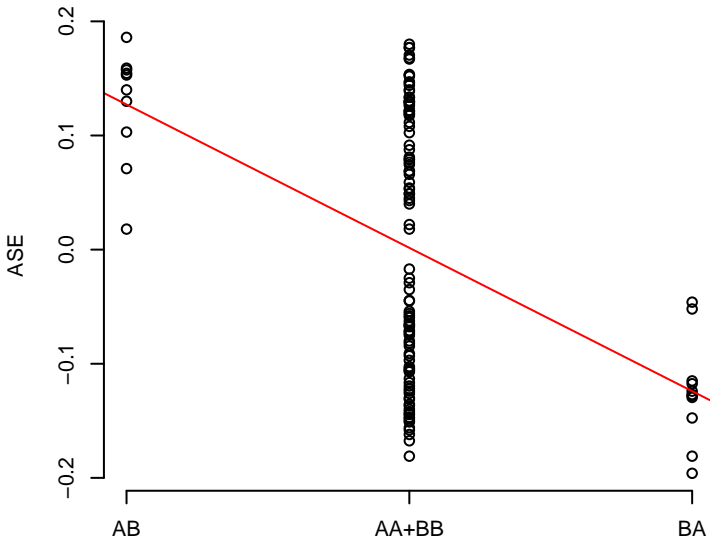

2 rs16826658

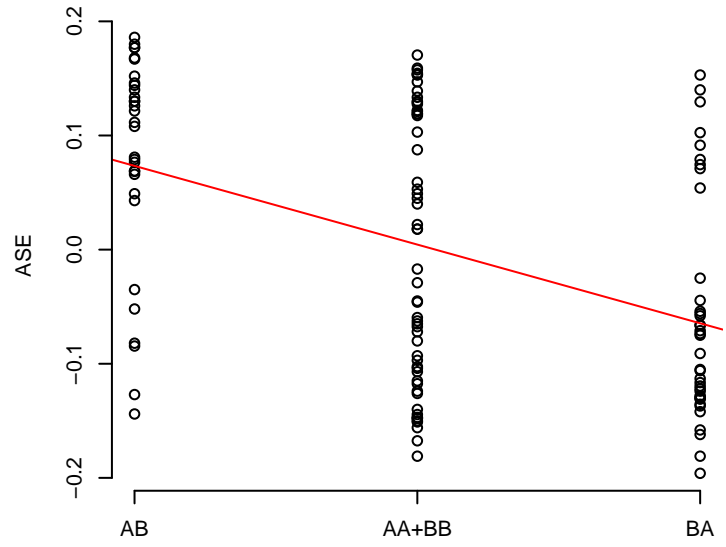

3 rs6663565

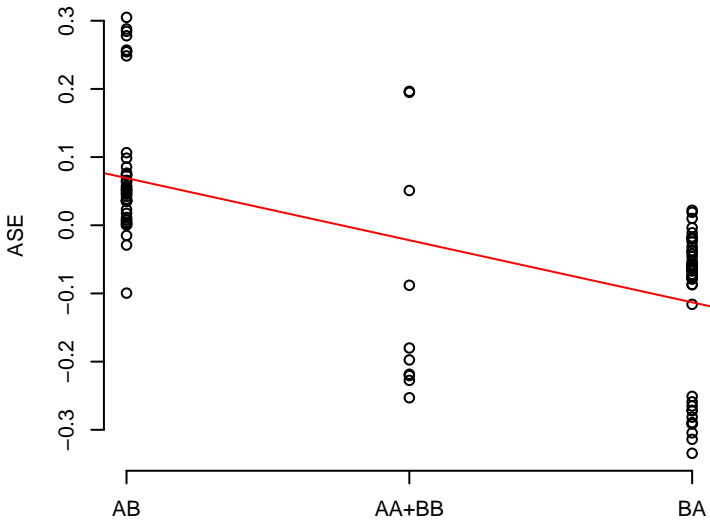

4 rs6687758

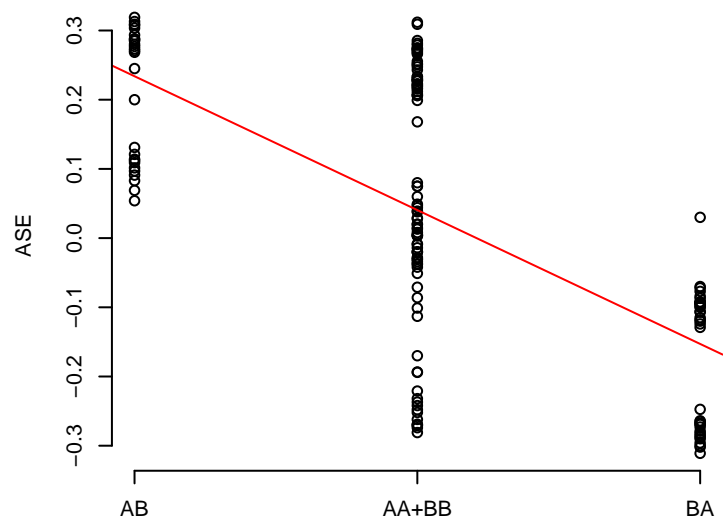

5 rs1876040

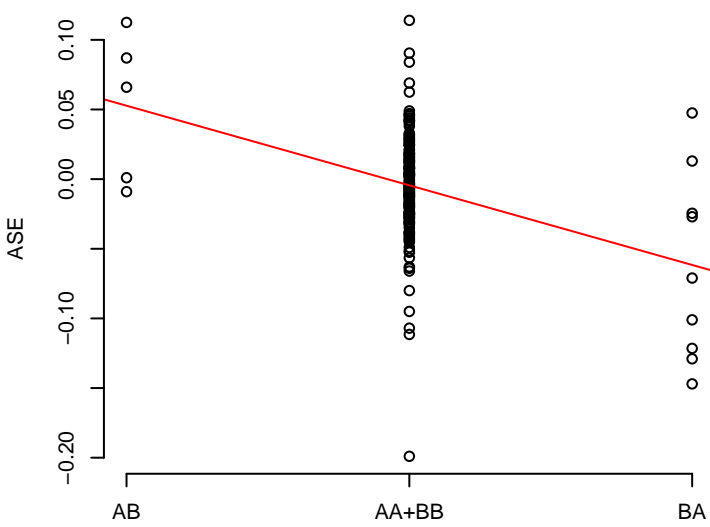

6 rs2310173

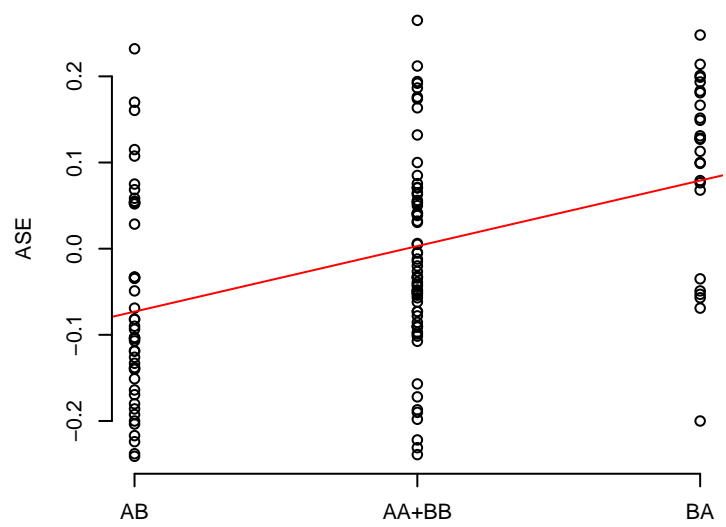

7 rs6710518

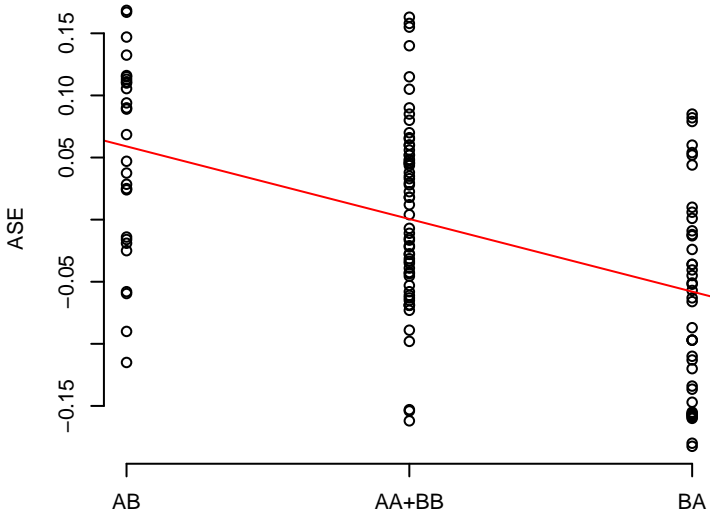

8 rs2303393

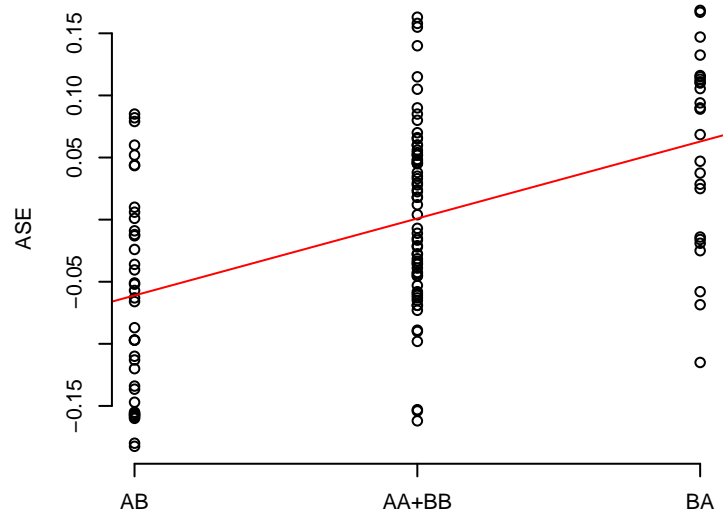

9 rs12638253

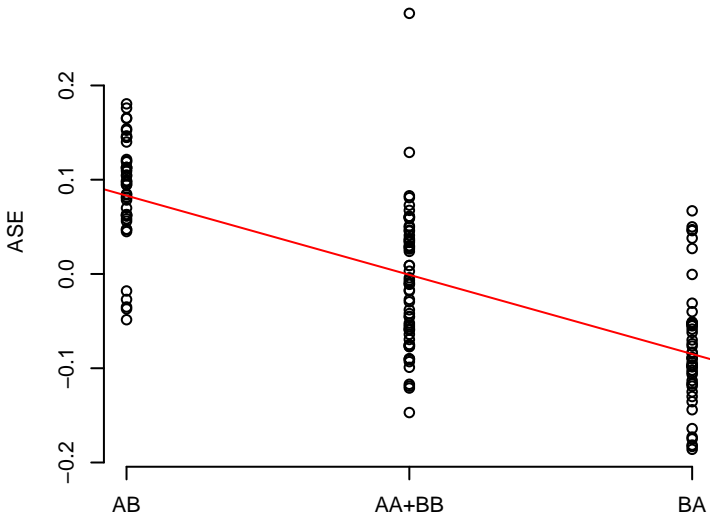

10 rs7686660

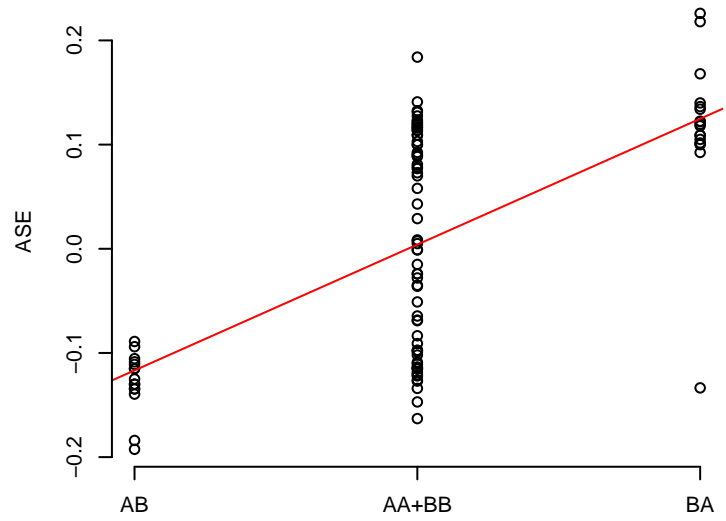

11 rs6922111

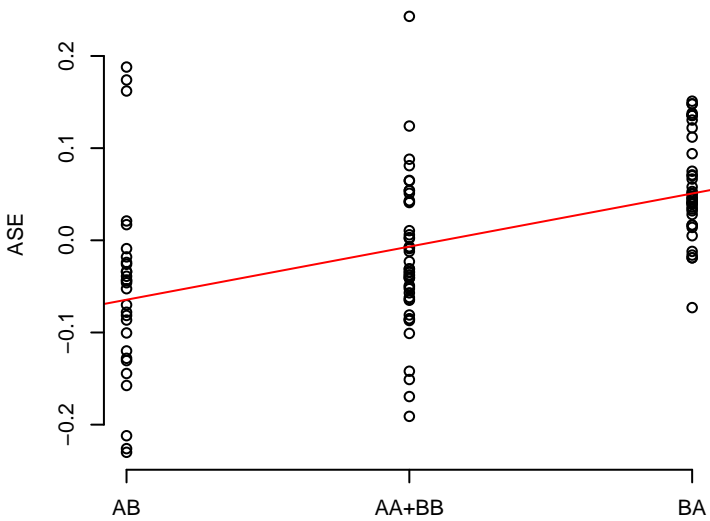

12 rs3893464

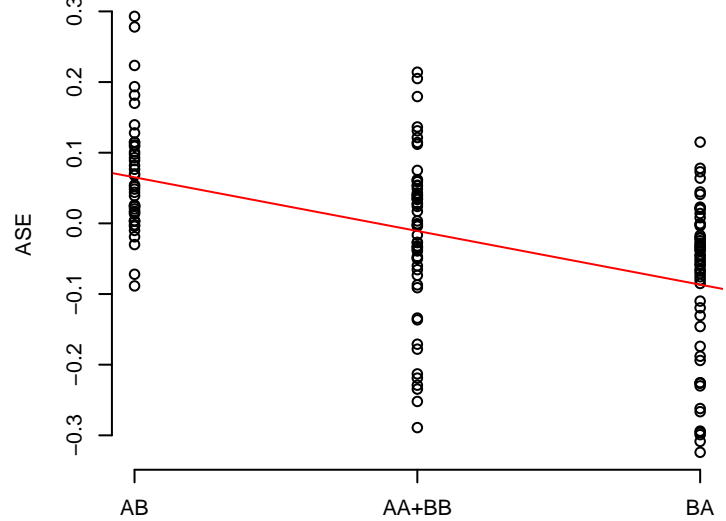

13 rs7739434

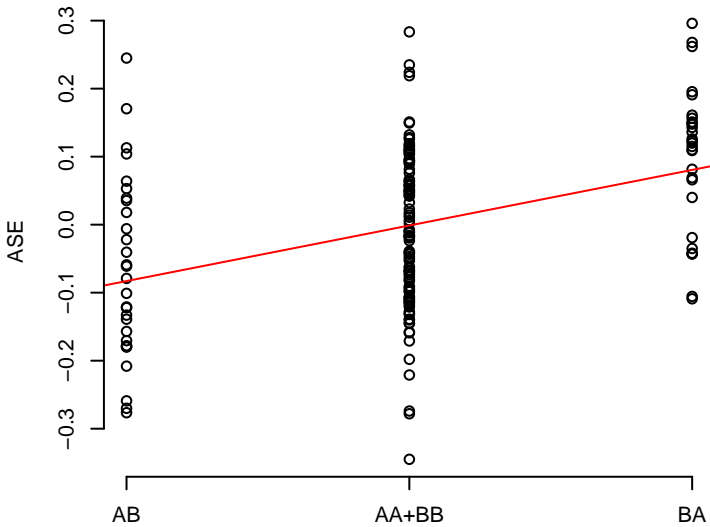

14 rs13214831

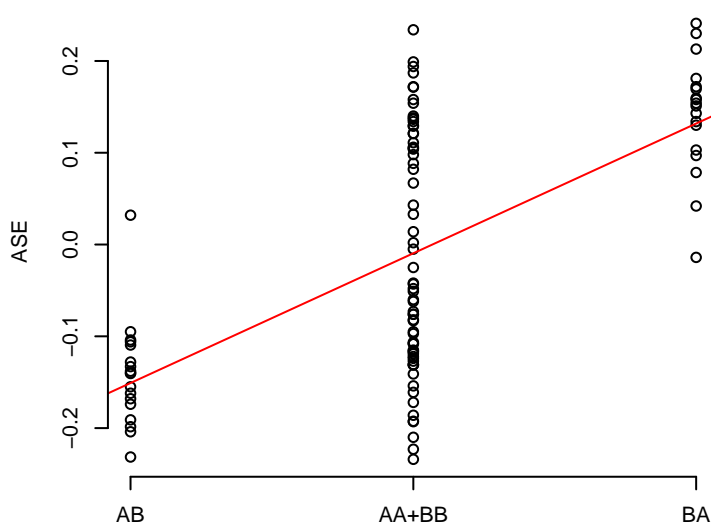

15 rs4248154

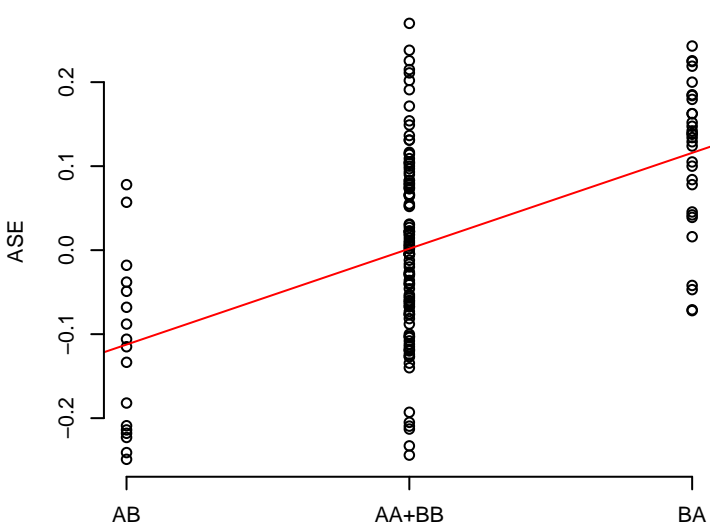

16 rs4928431

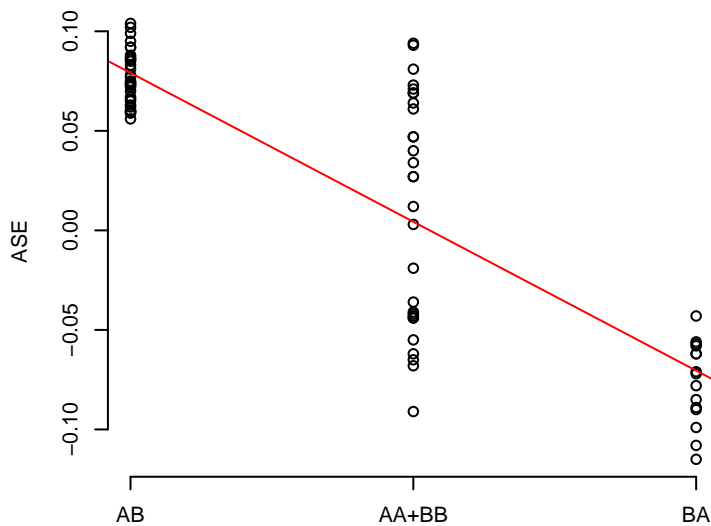

17 rs10256972

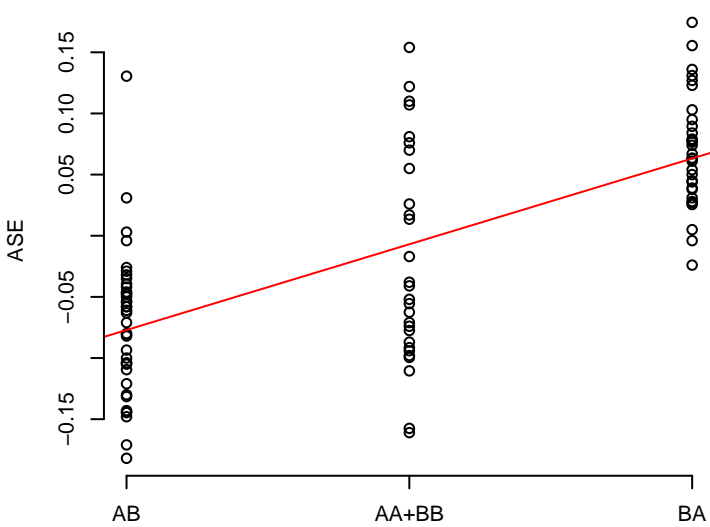

18 rs10259085

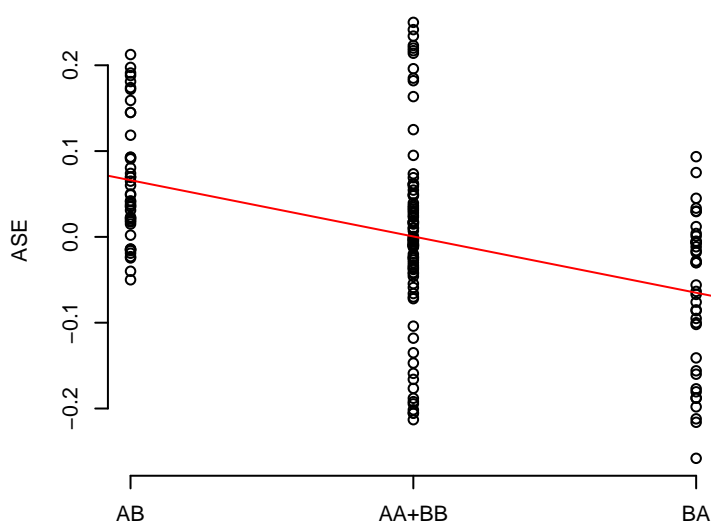

19 rs1299548

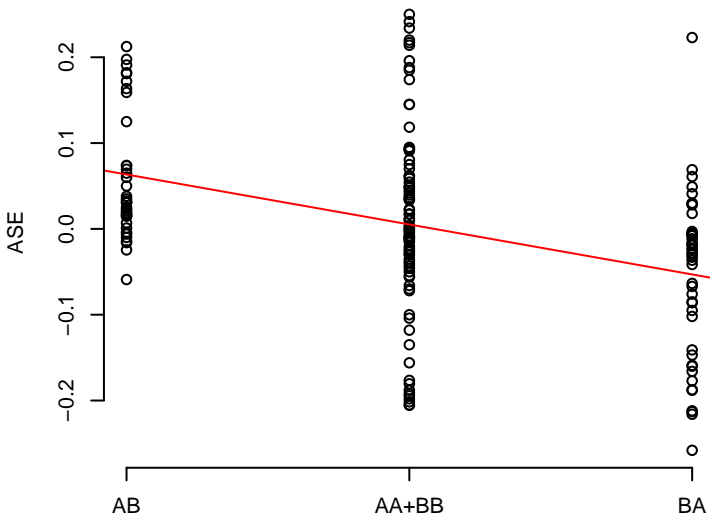

20 rs13278062

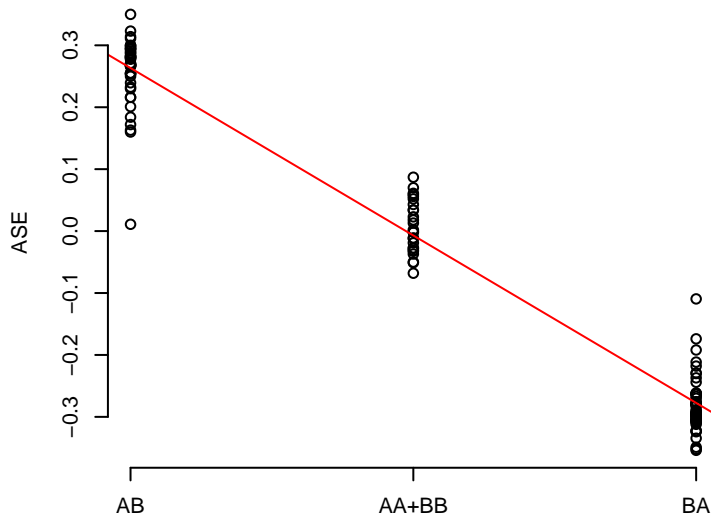

21 rs1953126

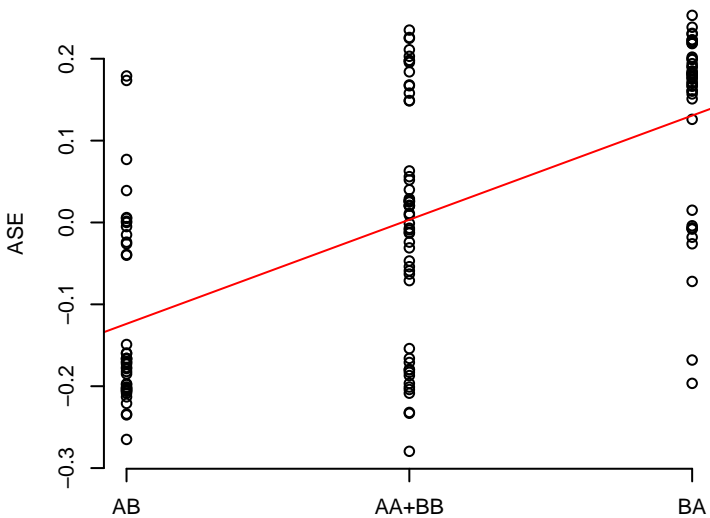

22 rs881375

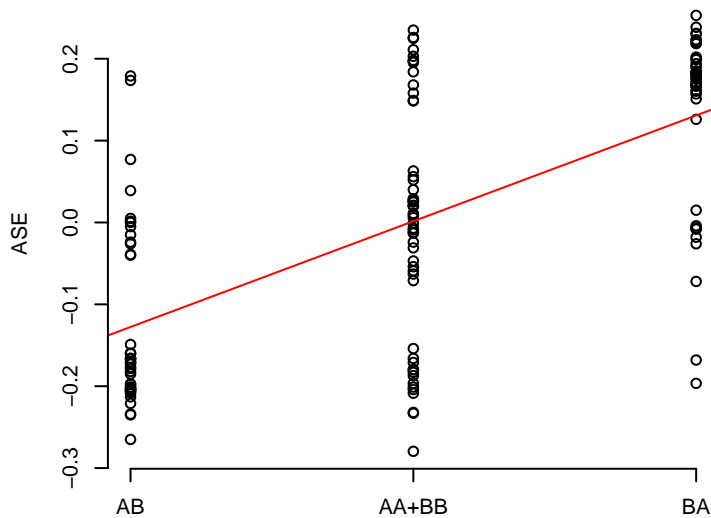

23 rs3761847

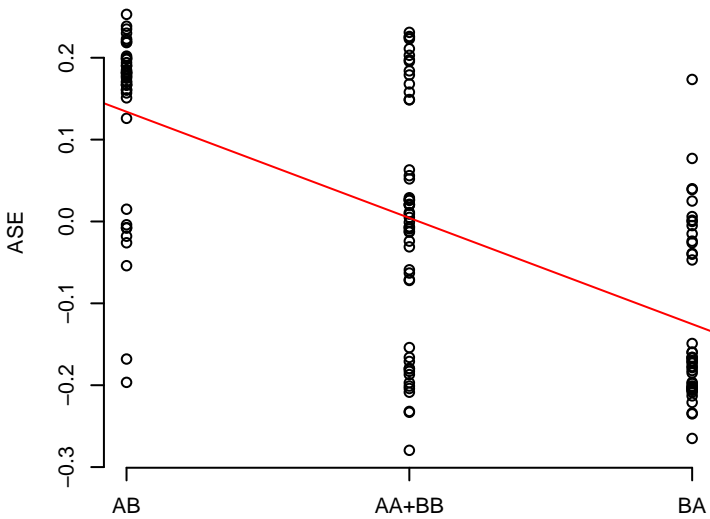

24 rs687621

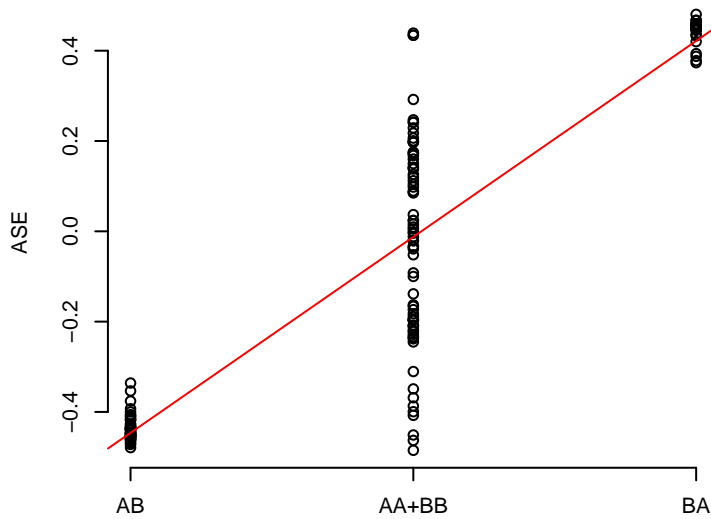

25 rs657152

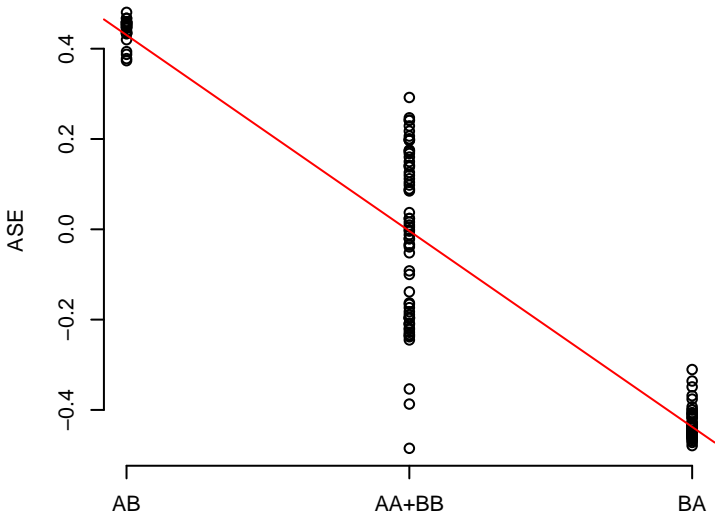

26 rs643434

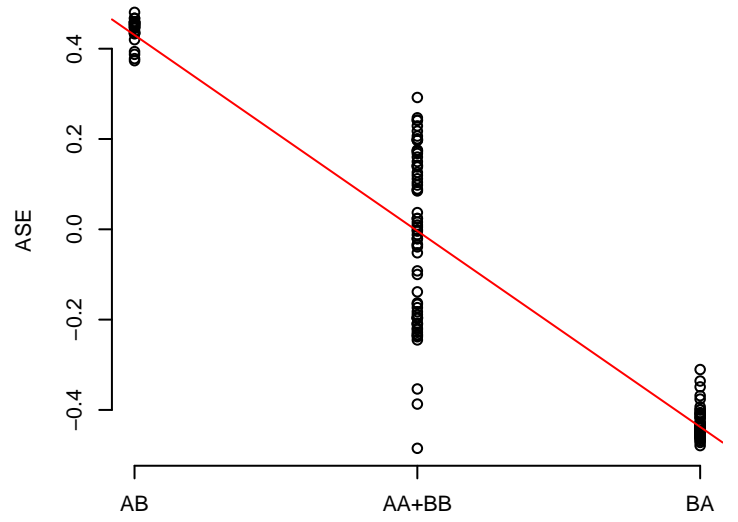

27 rs612169

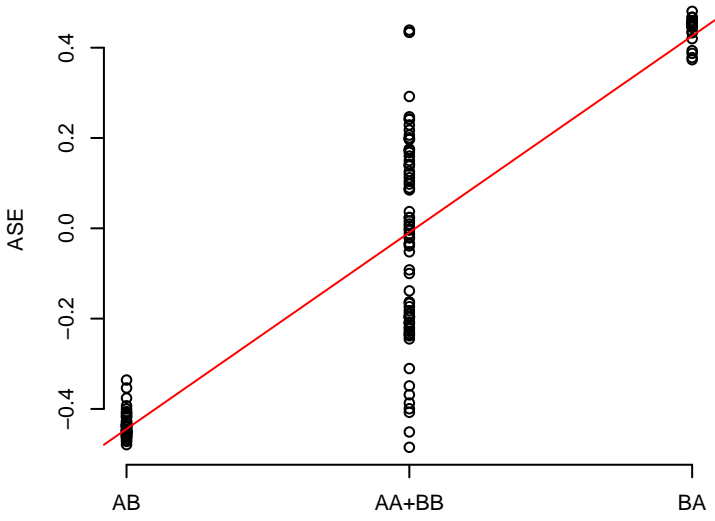

28 rs505922

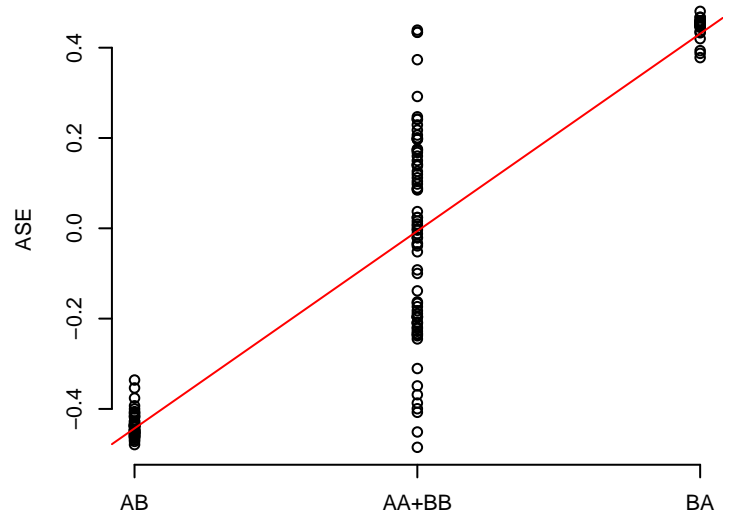

29 rs507666

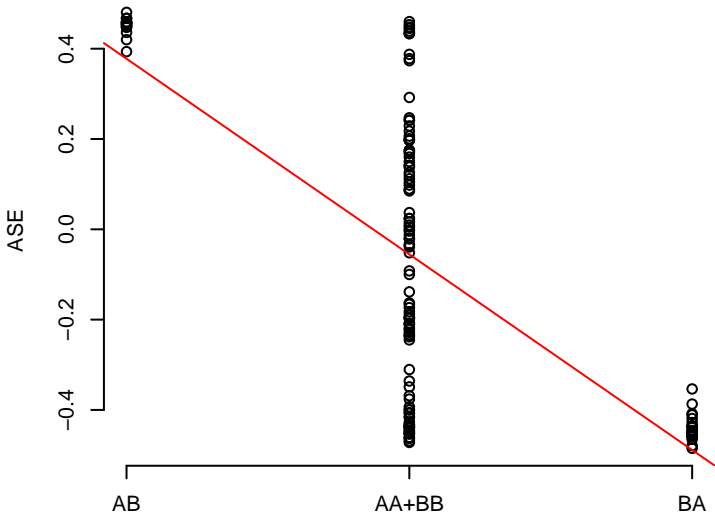

30 rs579459

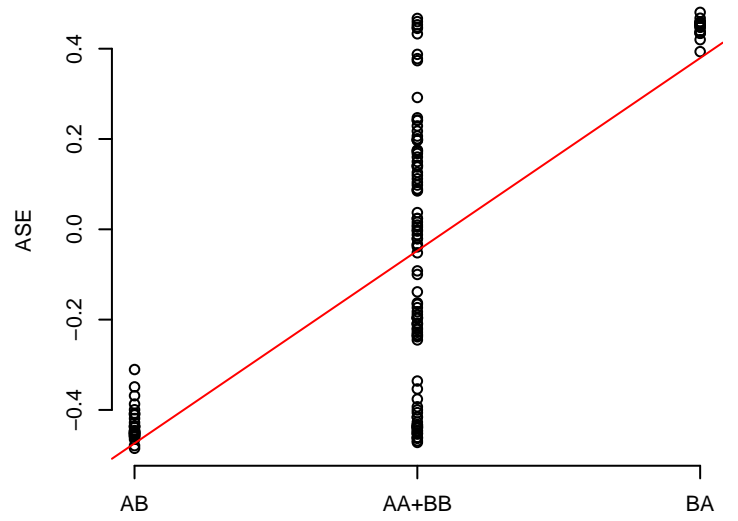

31 rs495828

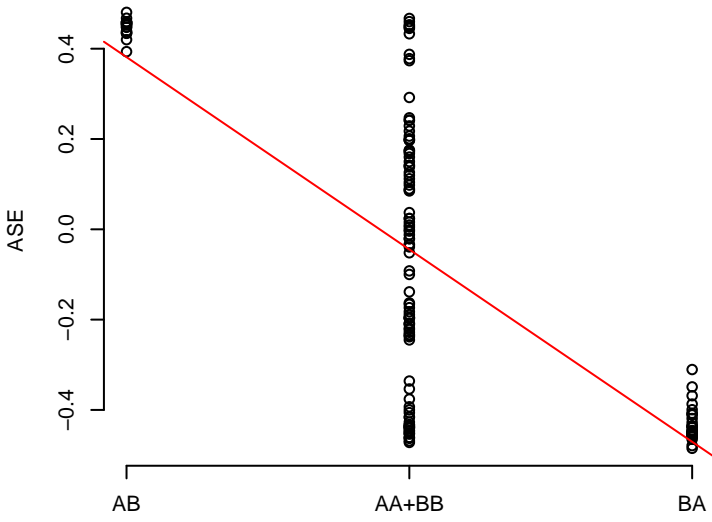

32 rs9423406

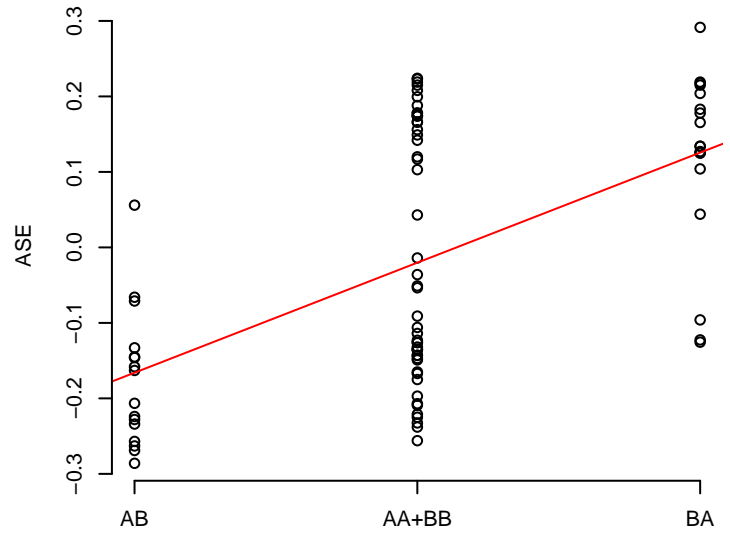

33 rs7896729

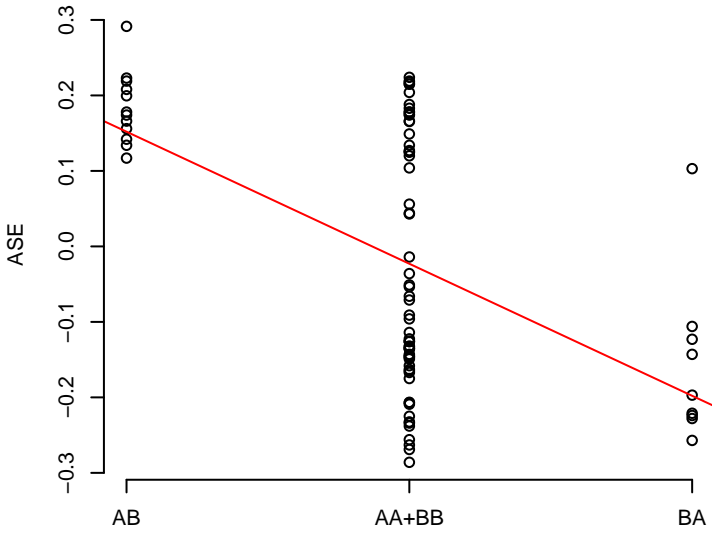

34 rs1153862

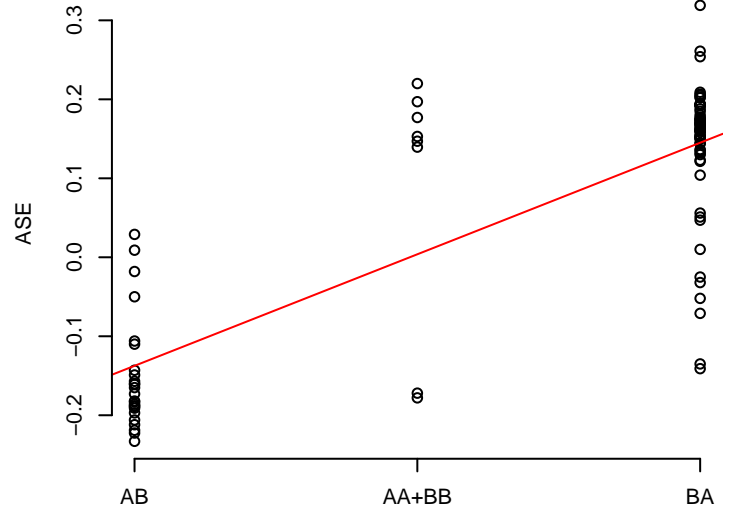

35 rs12442557

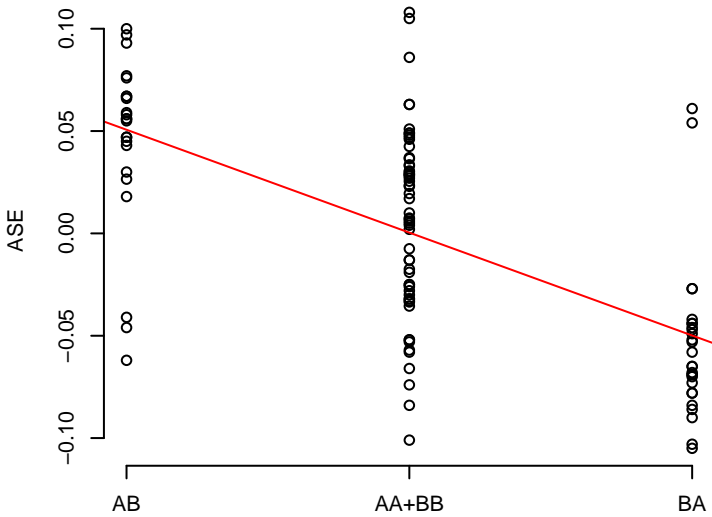

36 rs3760318

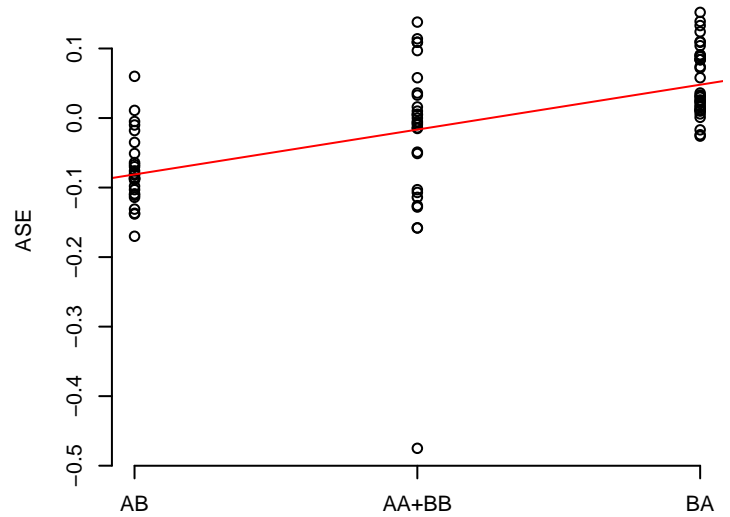

Supplement: pone.0102612.s003.pdf [file pone.0102612.s003.pdf]
