# Supplementary material for: Single Nucleotide Polymorphisms with Cis-Regulatory Effects on Long Non-Coding Transcripts in Human Primary Monocytes
Source: PubMed Central journal article supplement (PMC4099216; doi:10.1371/journal.pone.0102612), 2014-07-15

## 1-22246211-rs2501276

22220000

22230000

22240000

22250000

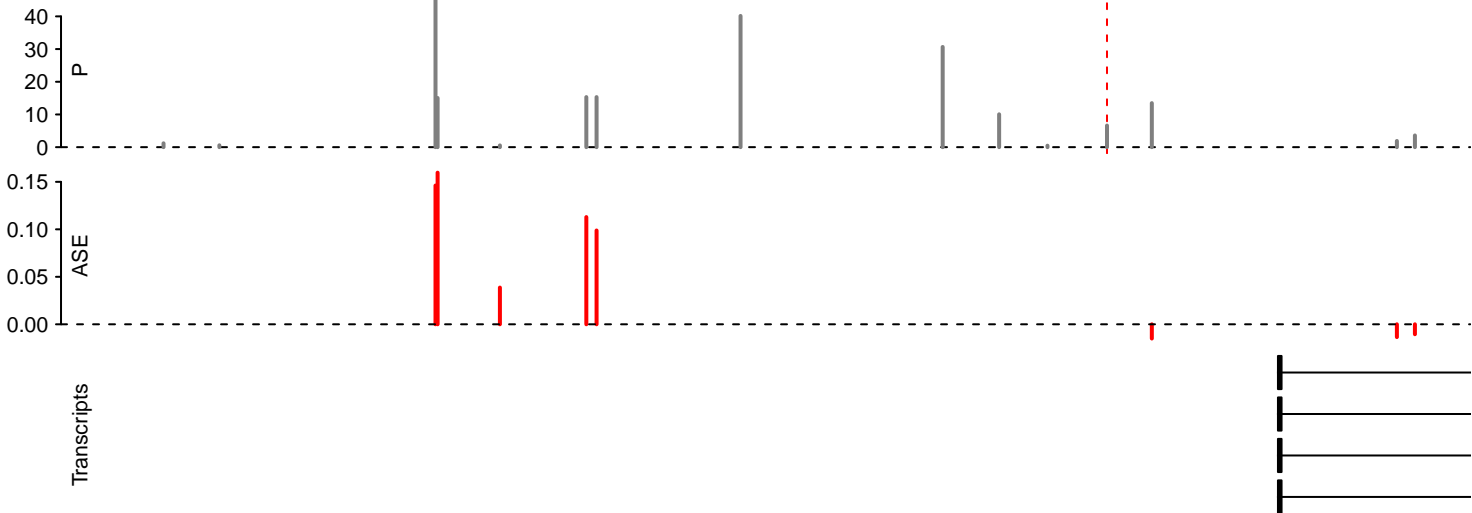

## 1-22358458-rs16826658

22250000

22300000

22350000

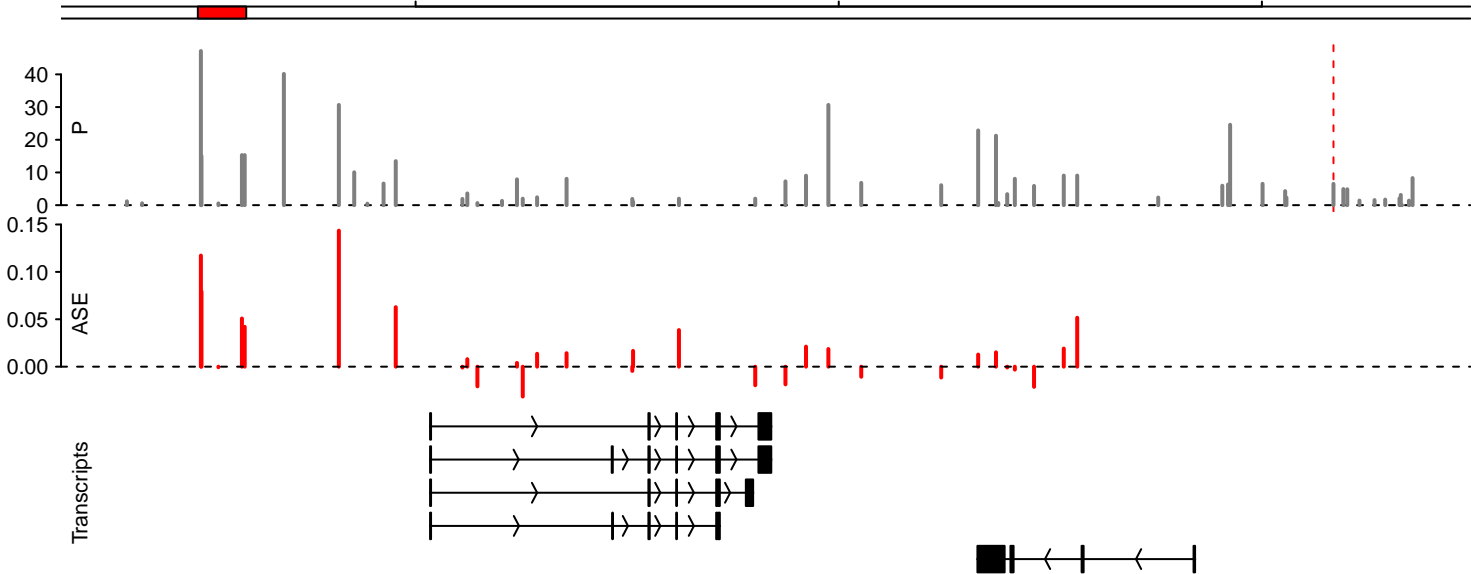

## 1-41336275-rs6663565

41350000

41400000

41450000

41500000

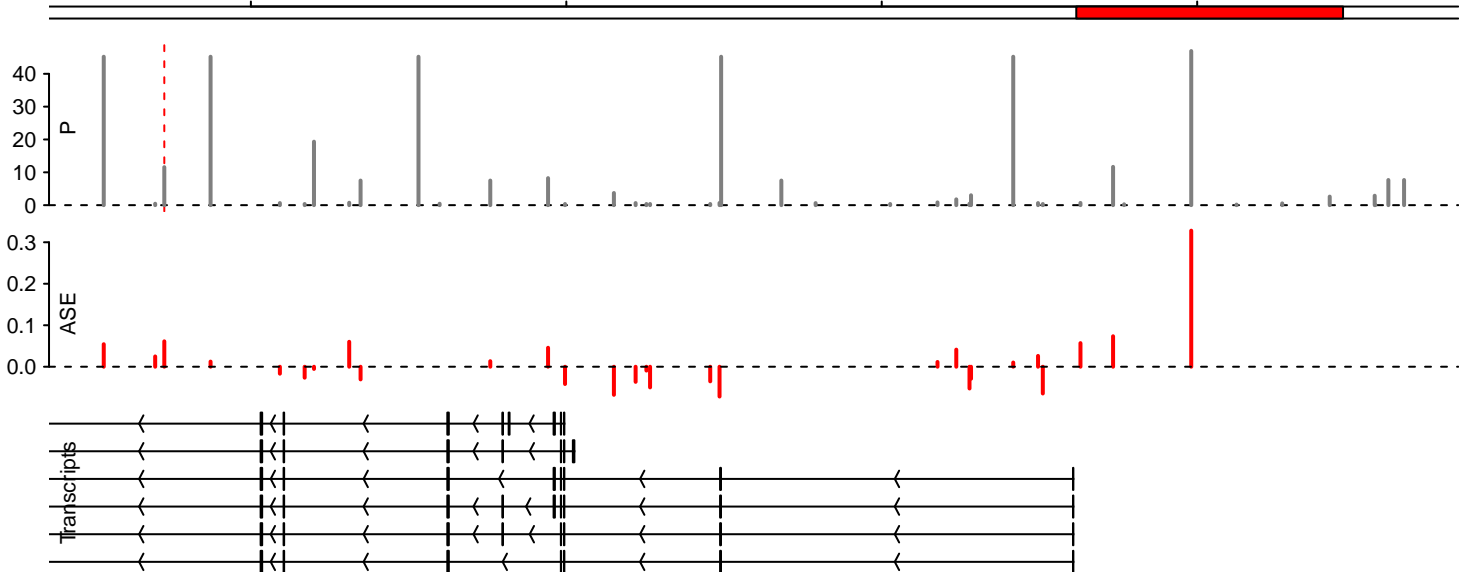

# 1-220231571-rs6687758

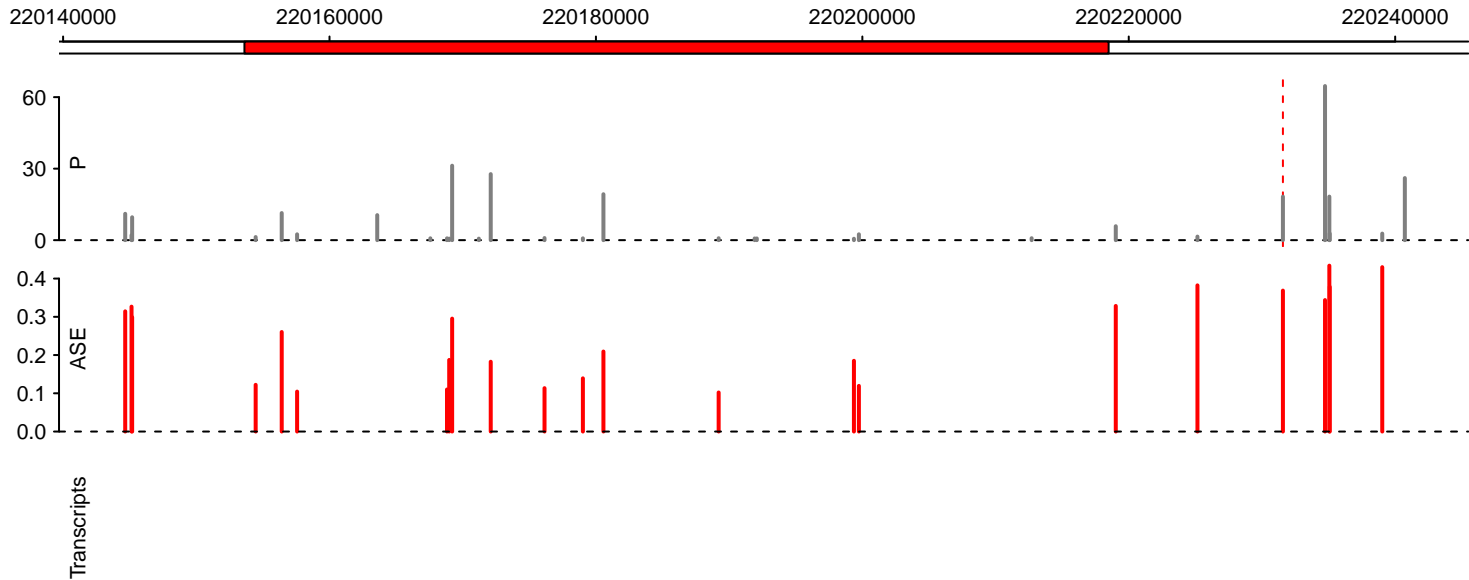

## 2-18998229-rs1876040

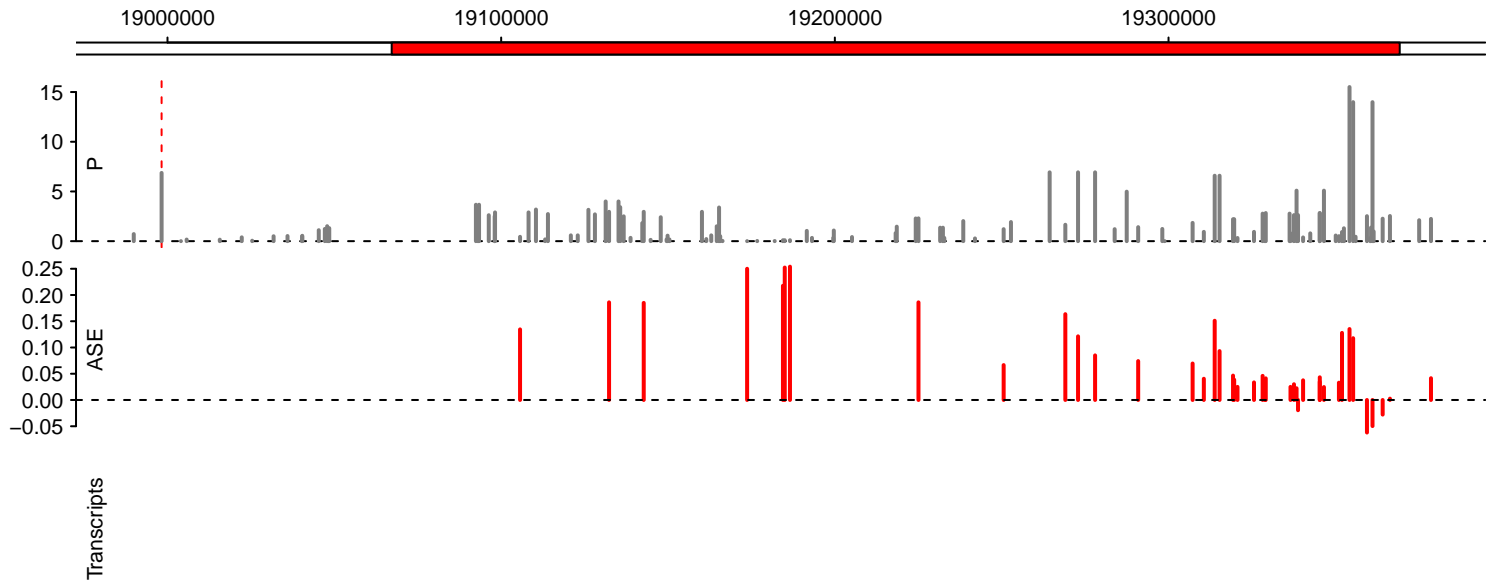

## 2-102030060-rs2310173

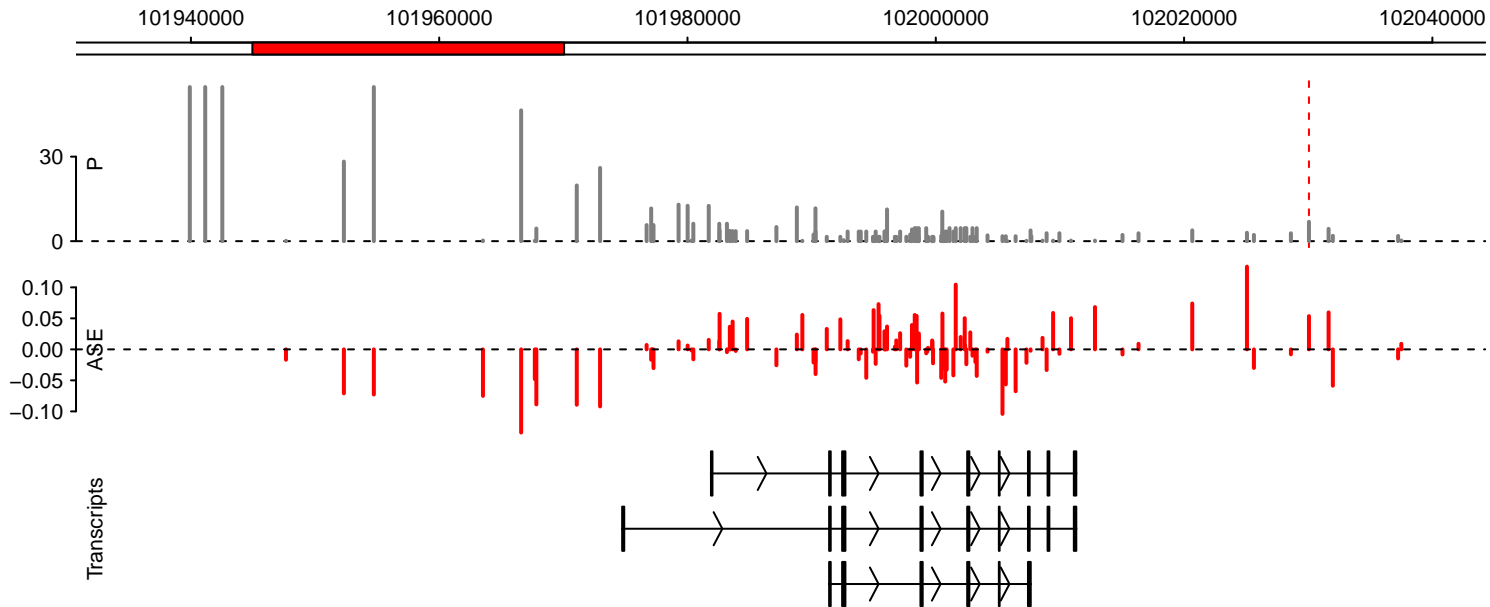

## 2-166291490-rs6710518

166280000 166300000 166320000 166340000 166360000 166380000 166400000 166420000

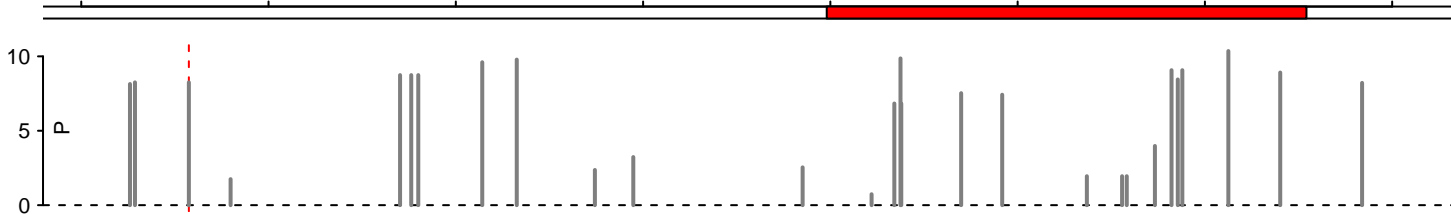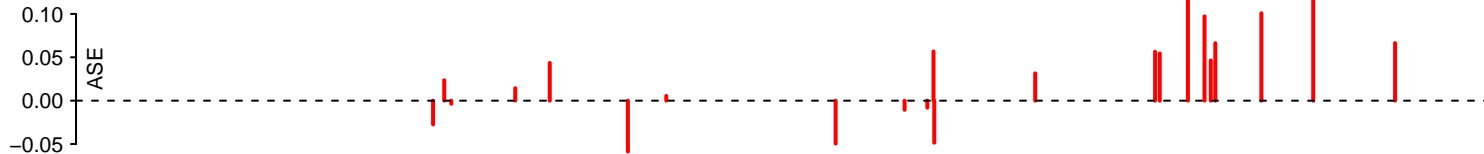

Transcripts

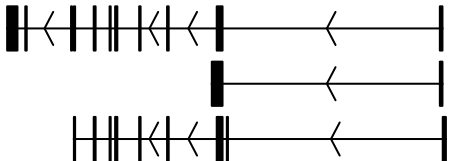

## 2-166314046-rs2303393

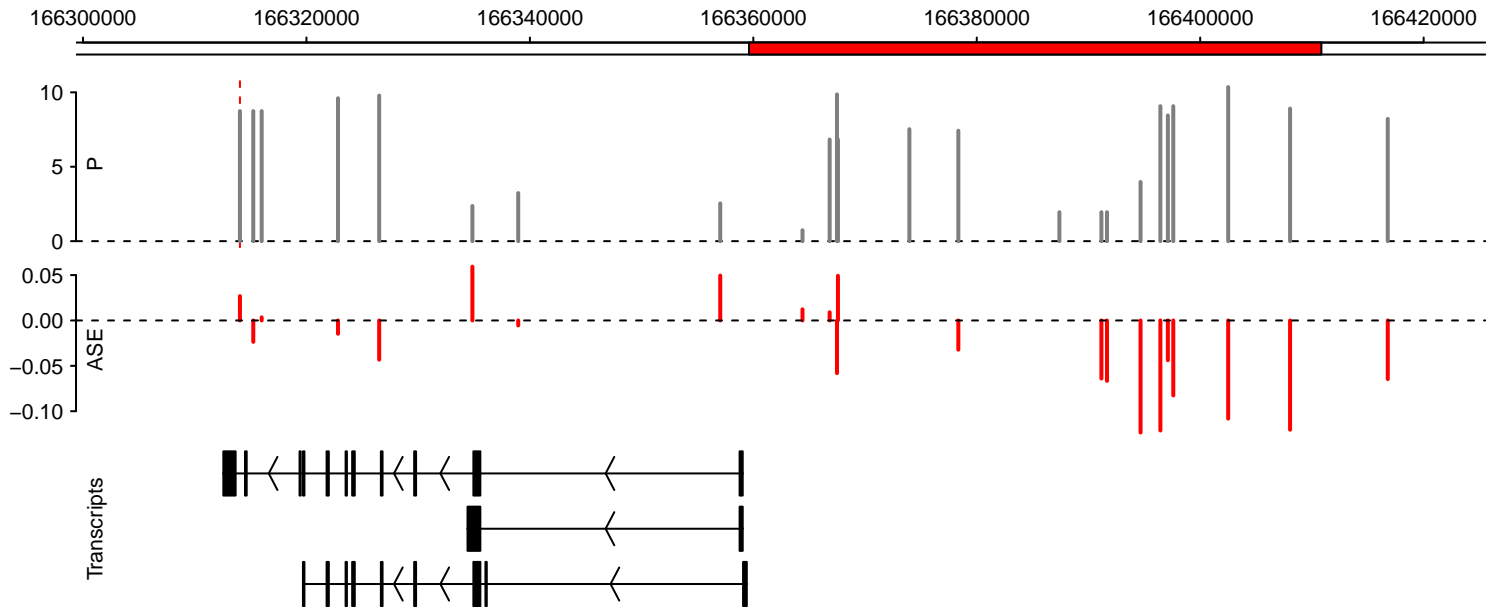



## 3-158108785-rs12638253

157950000

158000000

158050000

158100000

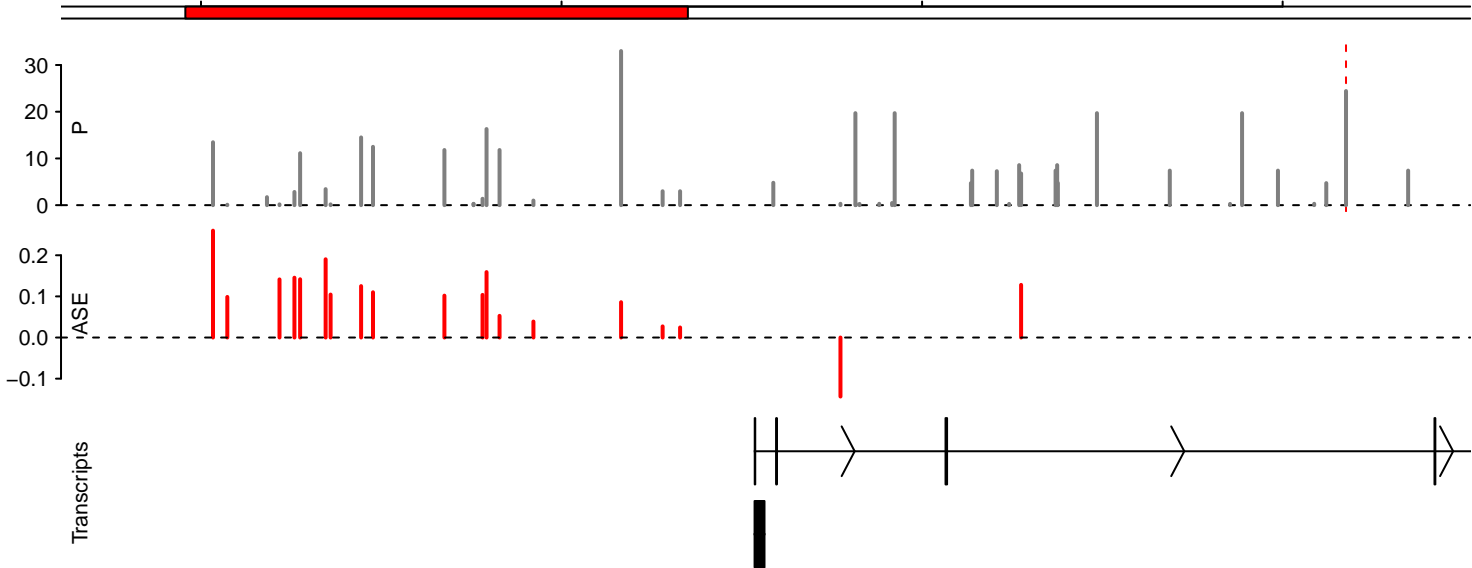

## 6-28433287-rs6922111

28250000

28300000

28350000

28400000

28450000

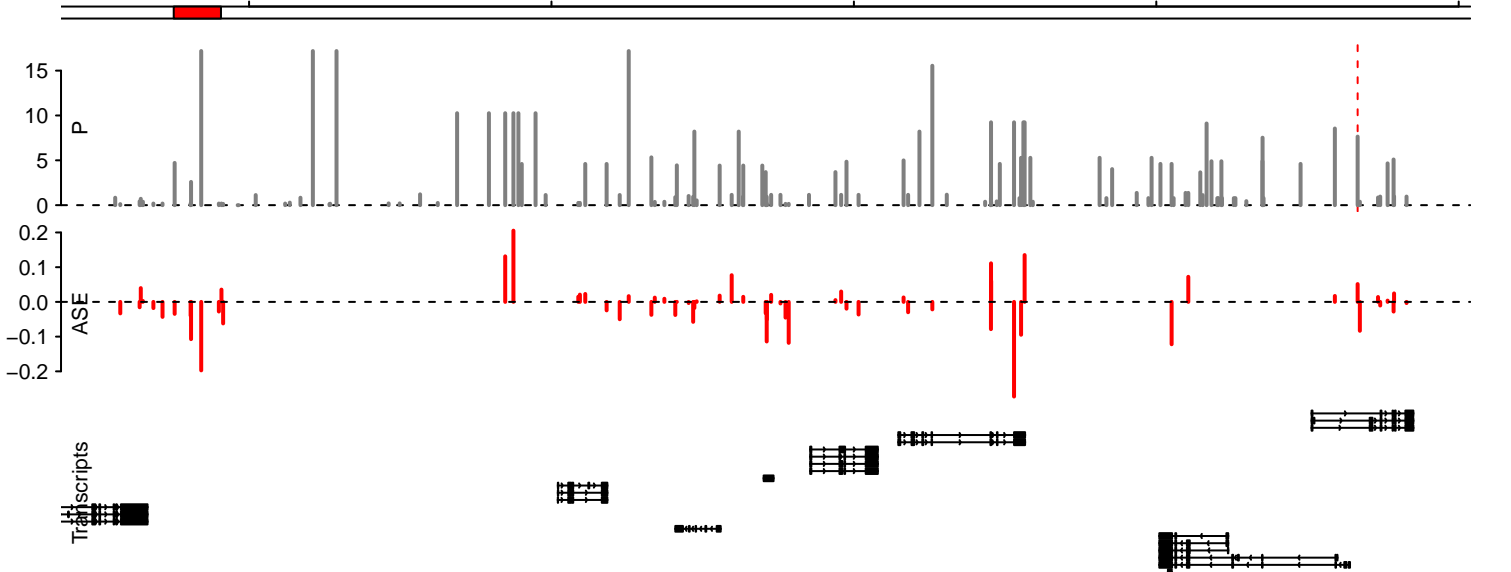

## 6-30043229-rs3893464

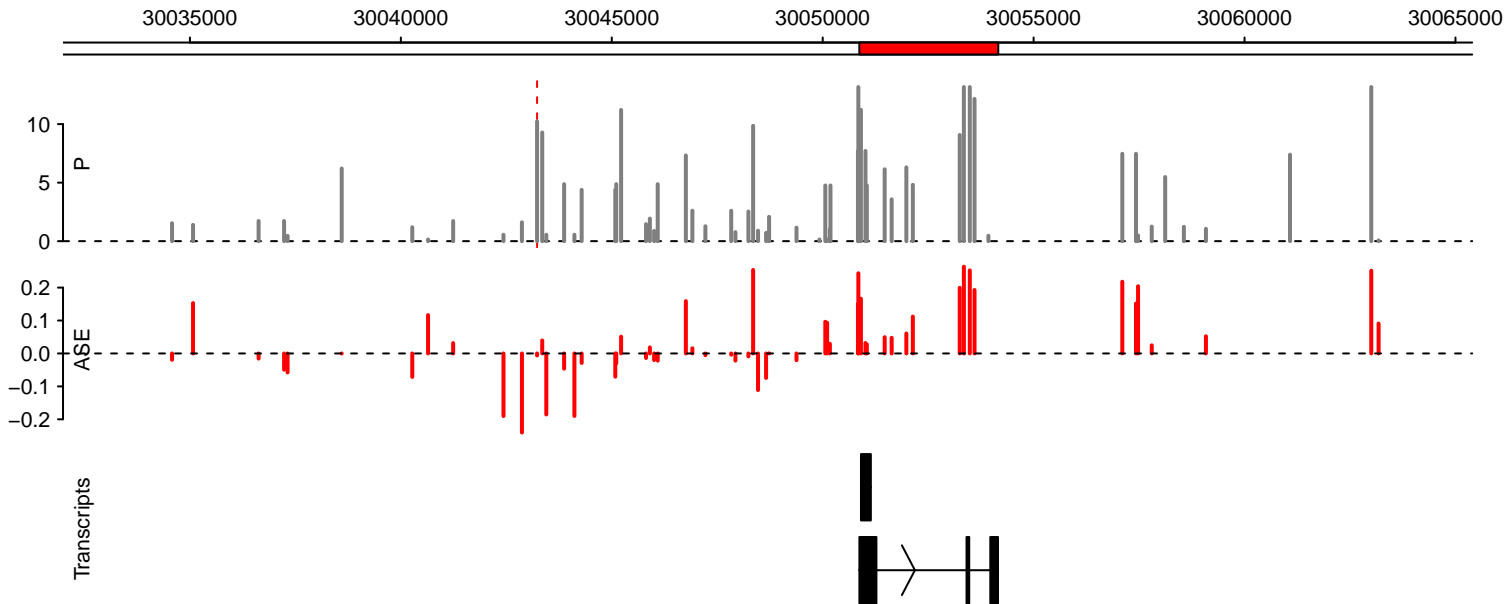

## 6-30038598-rs7739434

29800000

29850000

29900000

29950000

30000000

30050000

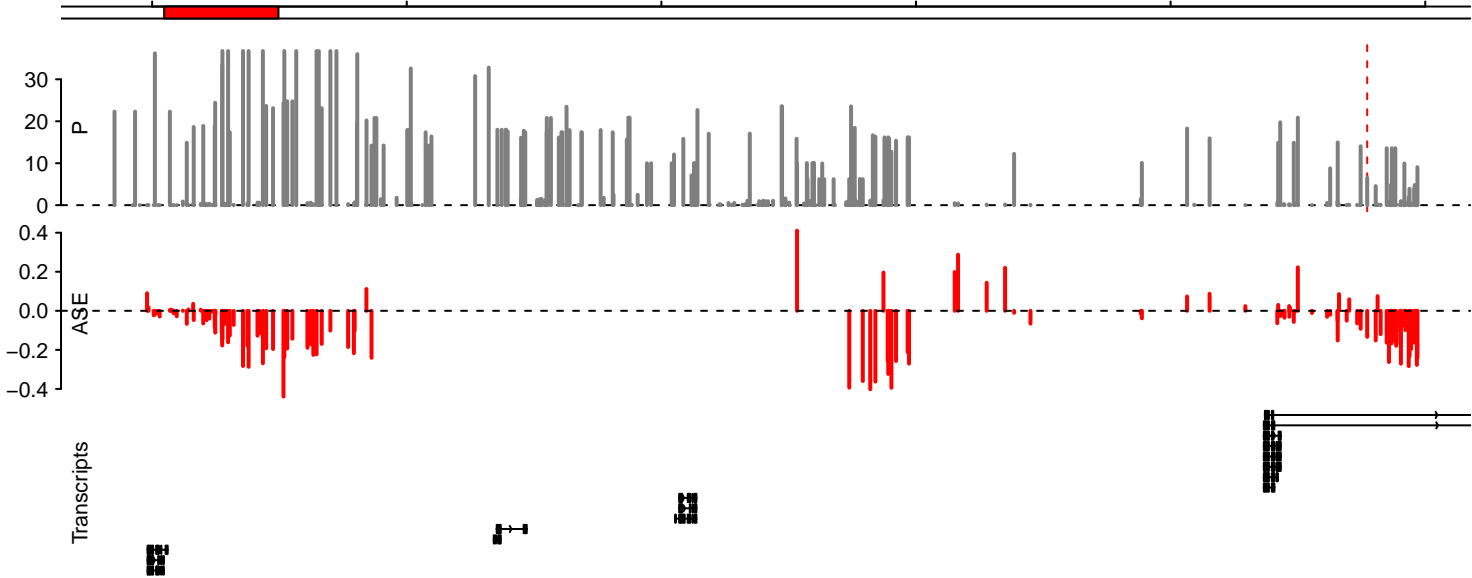

# 6-31110595-rs4248154

30900000

30950000

31000000

31050000

31100000

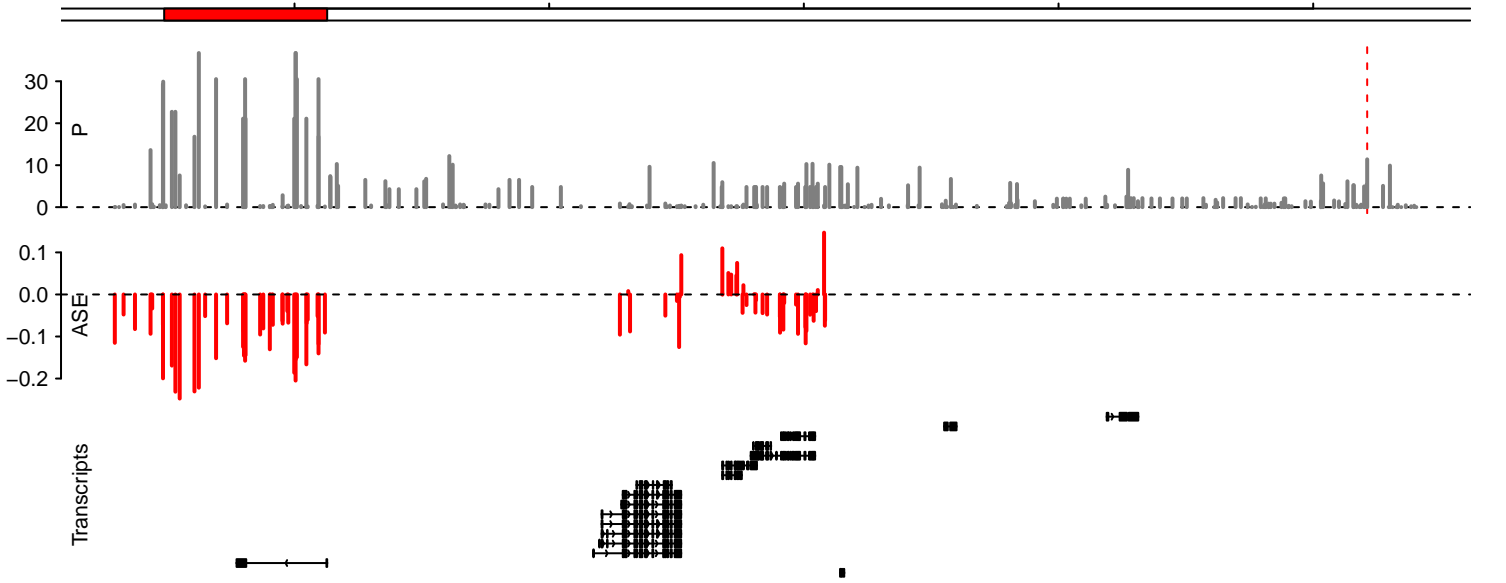

## 6-58414217-rs4928431

58370000

58380000

58390000

58400000

58410000

58420000

P

30

20

10

0

0.15

0.10

0.05

0.00

Transcripts

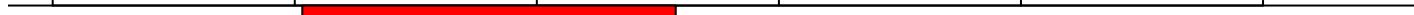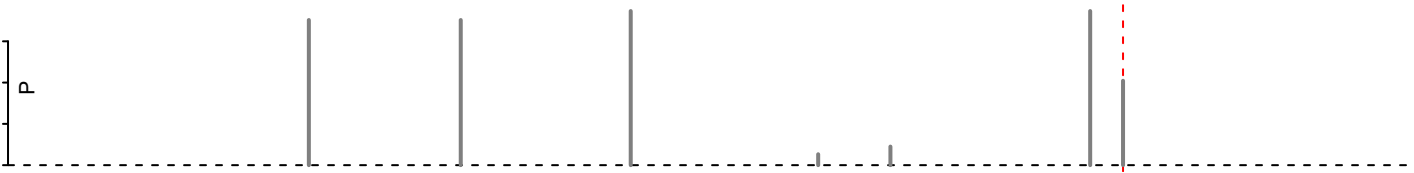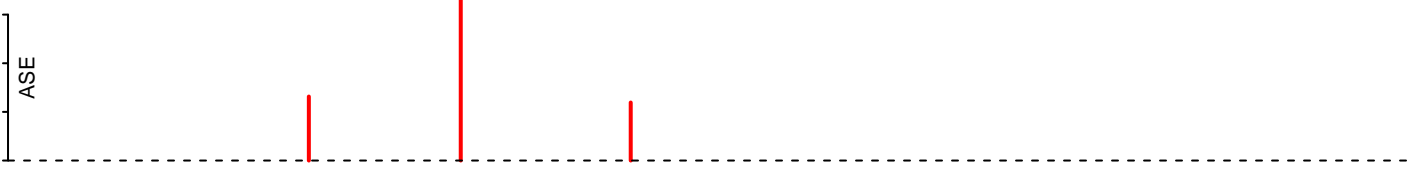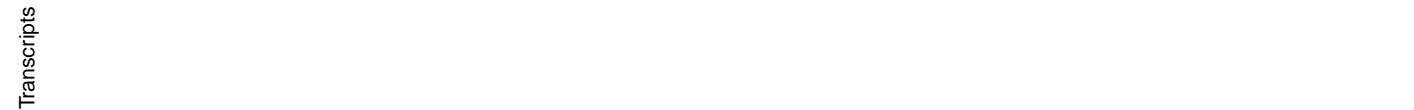

## 7-1005529-rs10256972

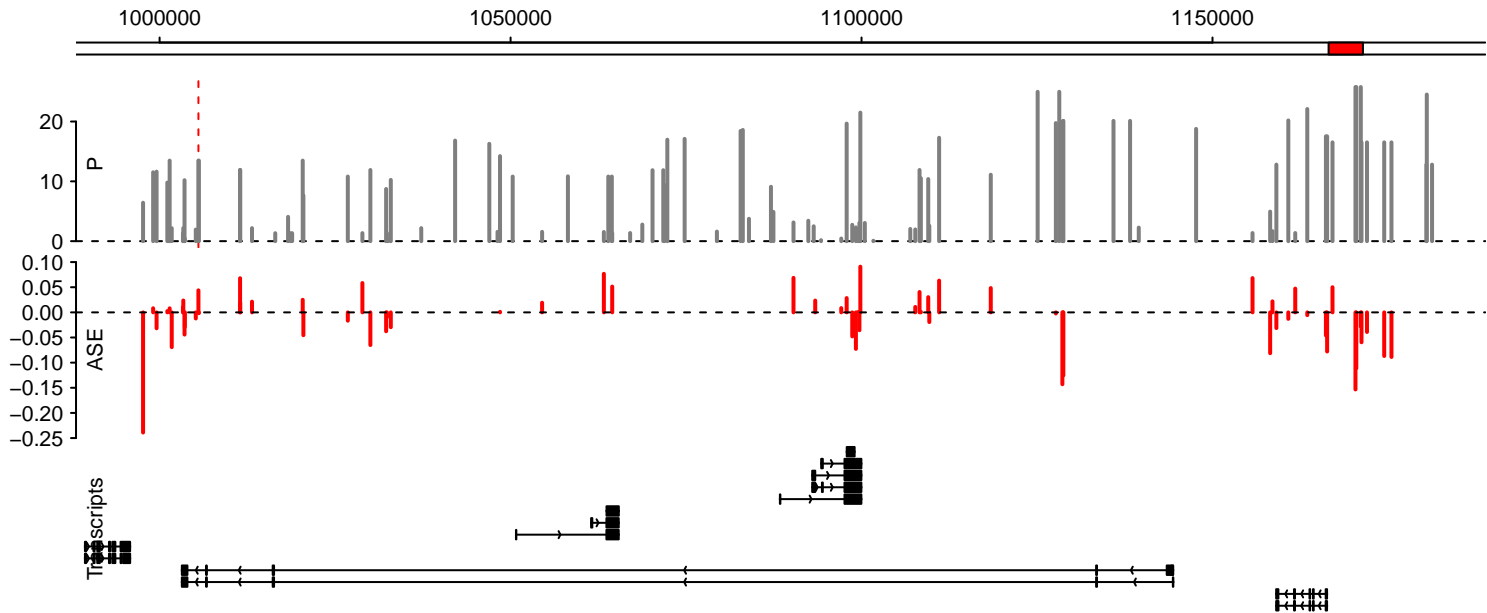

## 7-7234956-rs10259085

7230000

7240000

7250000

7260000

7270000

7280000

7290000

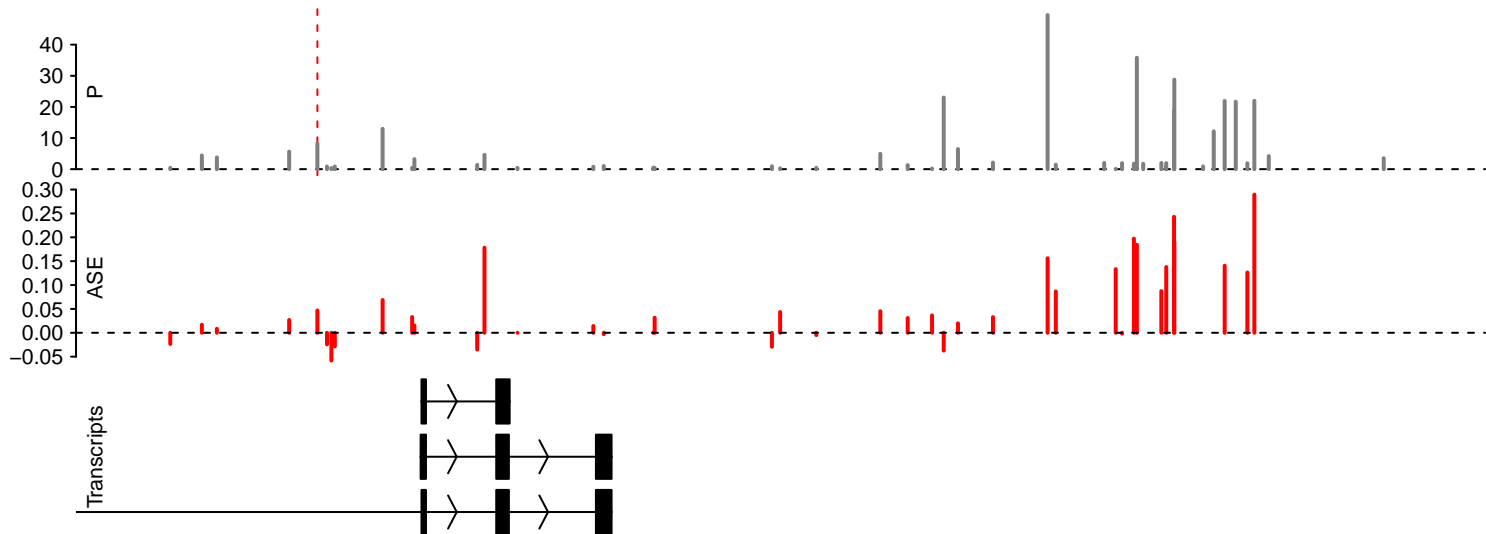



## 7-7268818-rs1299548

7250000 7260000 7270000 7280000 7290000

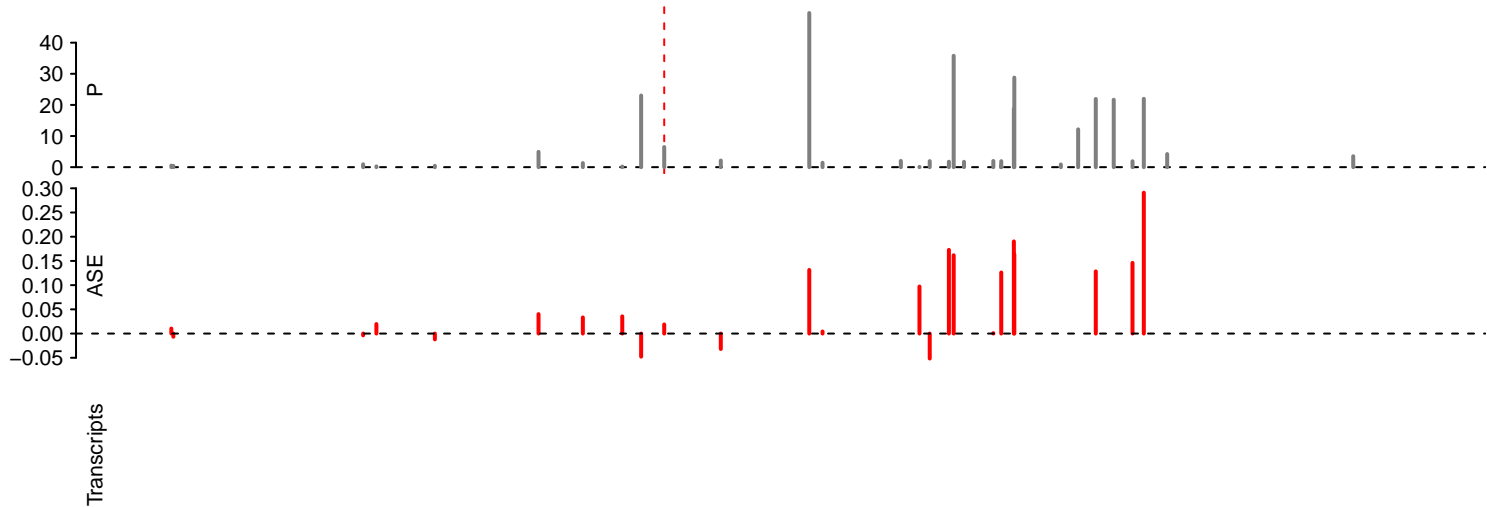

## 8-23138916-rs13278062

23130000

23135000

23140000

23145000

23150000

23155000

P

60

30

0

0.30

0.25

0.20

0.15

0.10

0.05

0.00

Transcripts

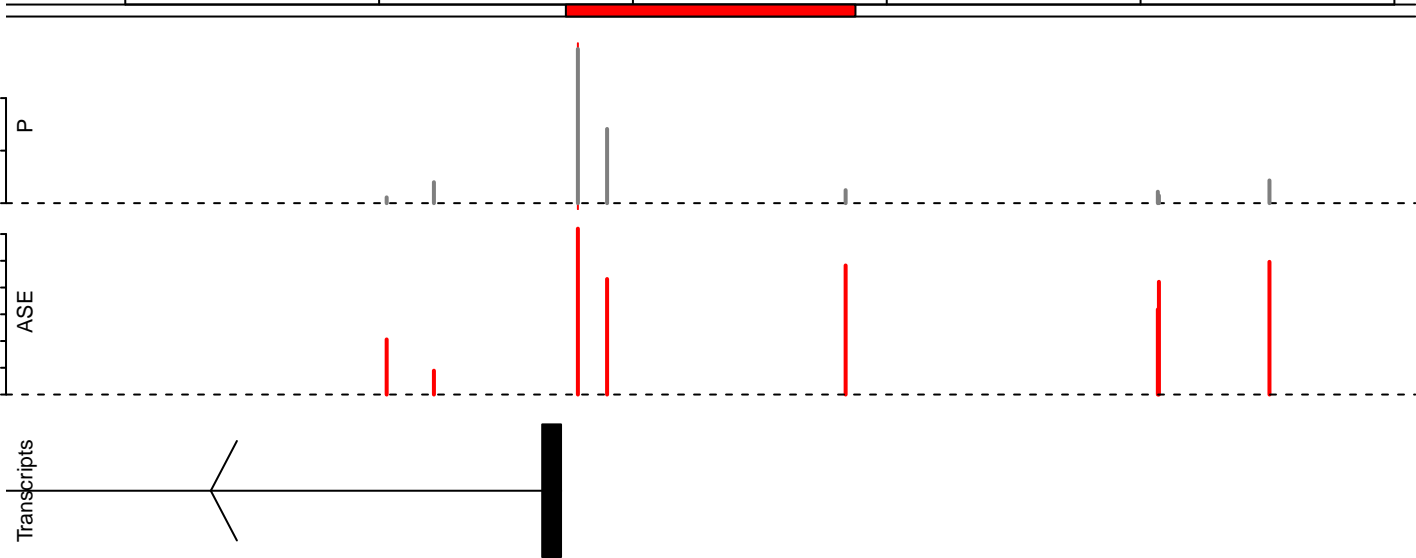

## 9-122680321-rs1953126

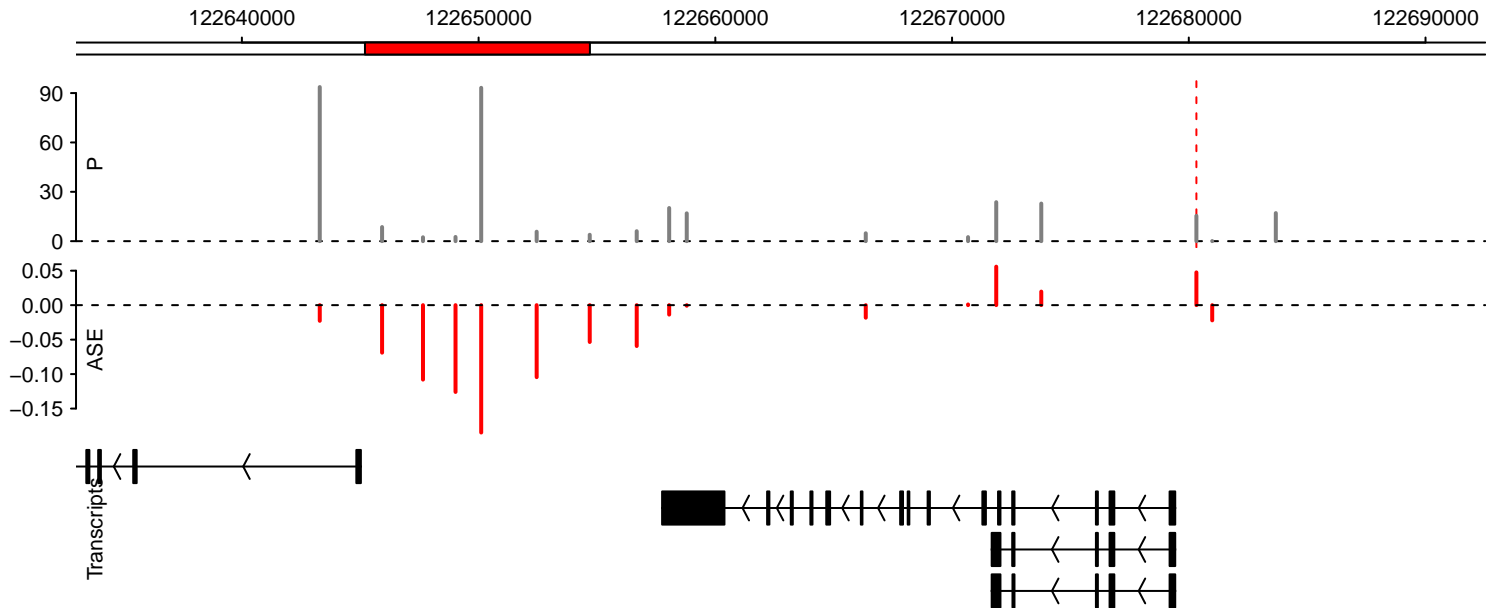

## 9-122692719-rs881375

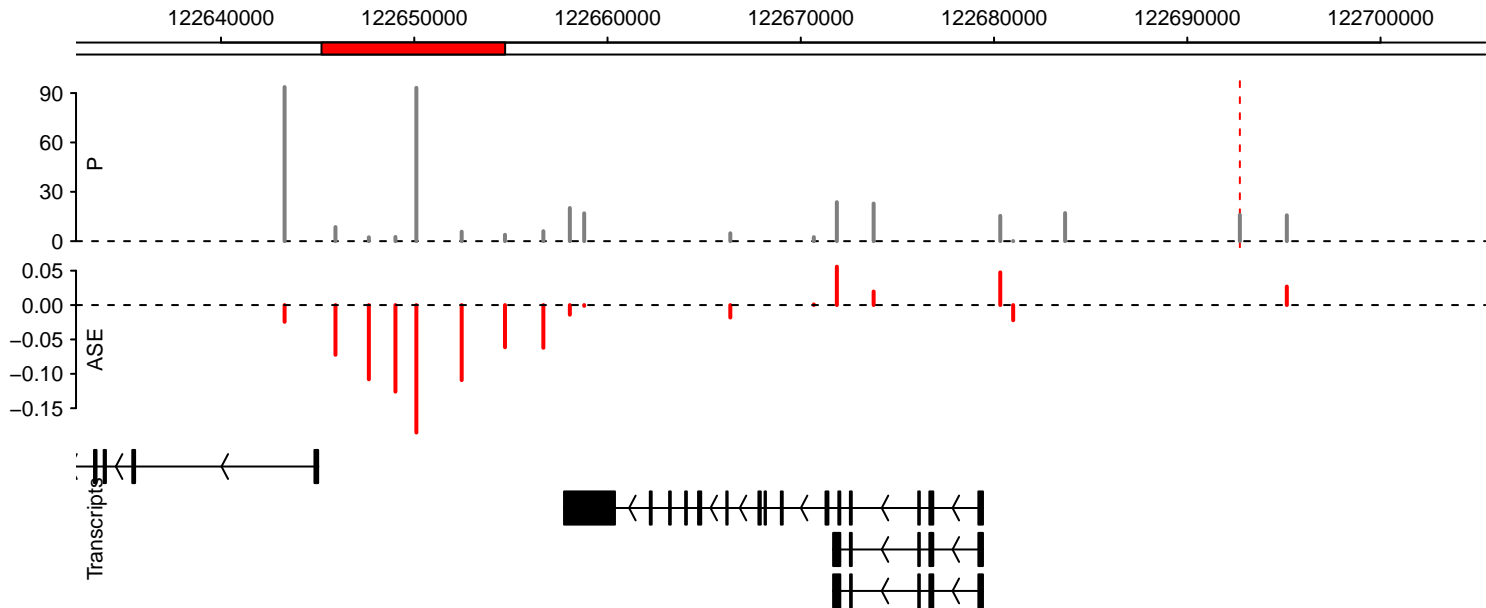

## 9-122730060-rs3761847

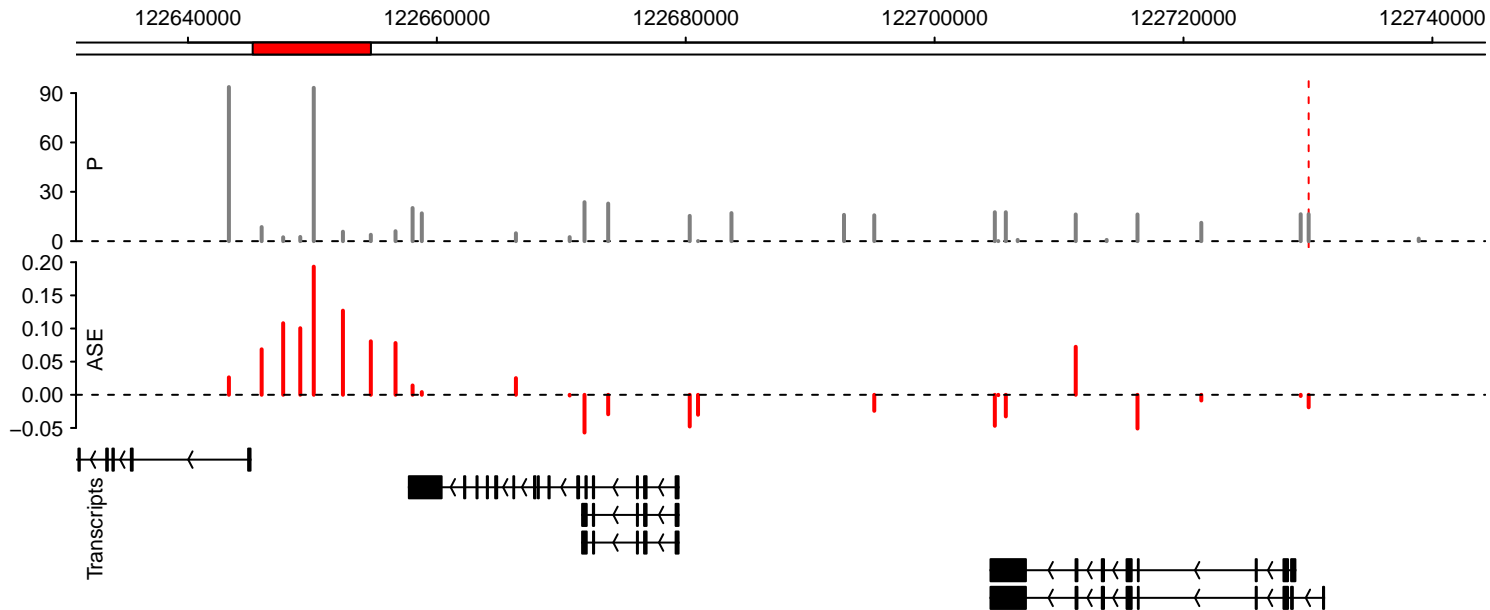

## 9-135126886-rs687621

135110000 135120000 135130000 135140000 135150000

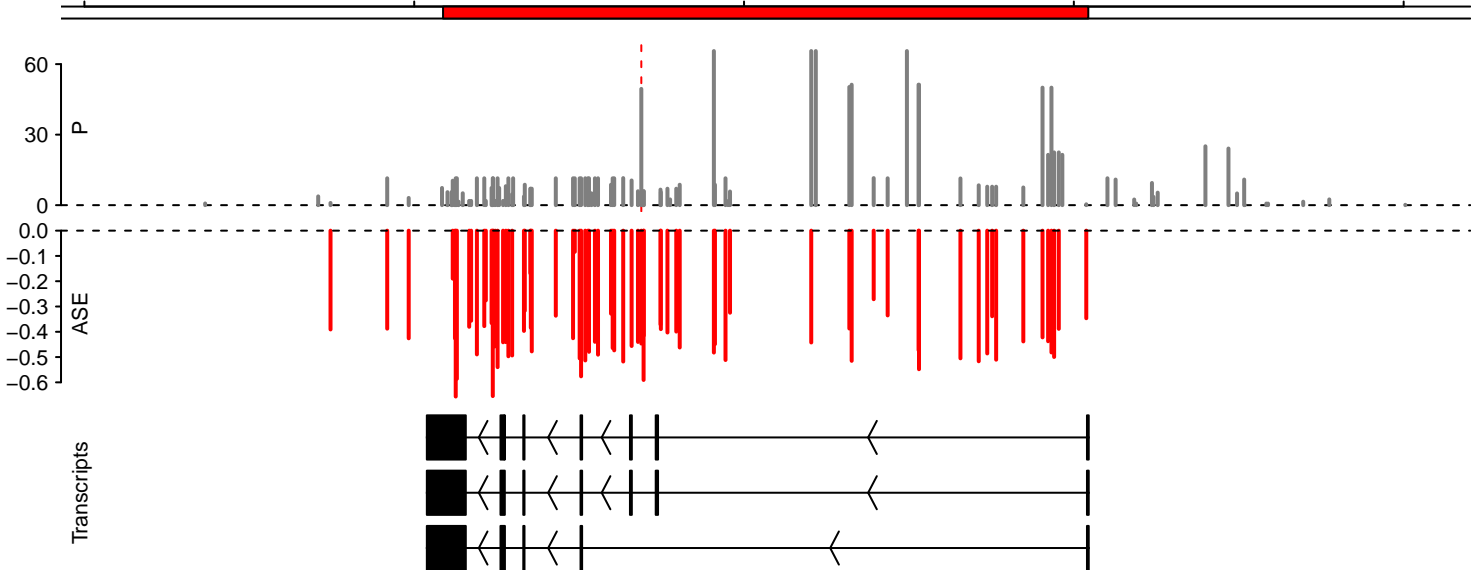

# 9-135129086-rs657152

135110000                      135120000                      135130000                      135140000                      135150000

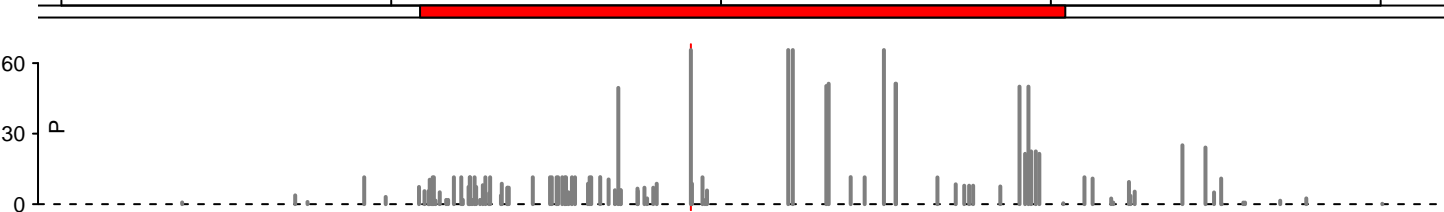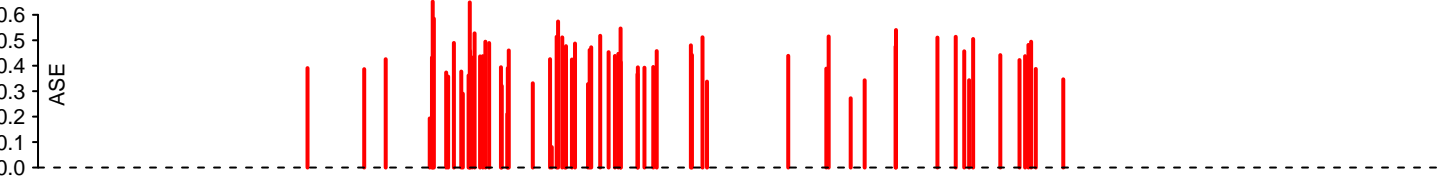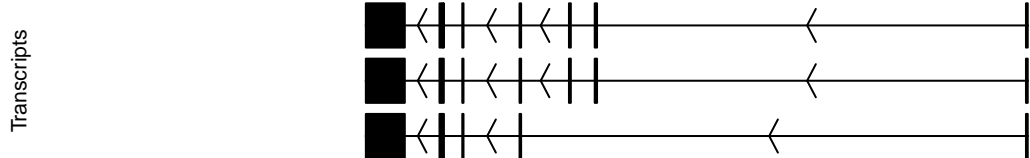

# 9-135132176-rs643434

135110000                      135120000                      135130000                      135140000                      135150000

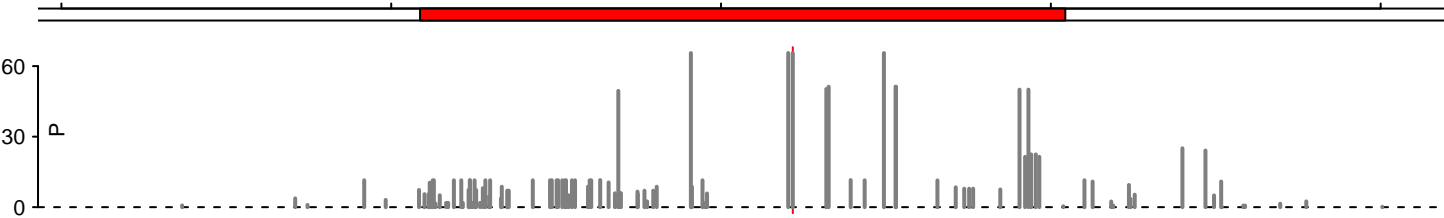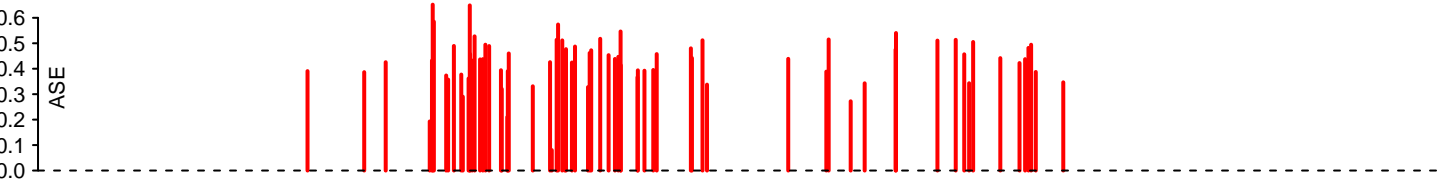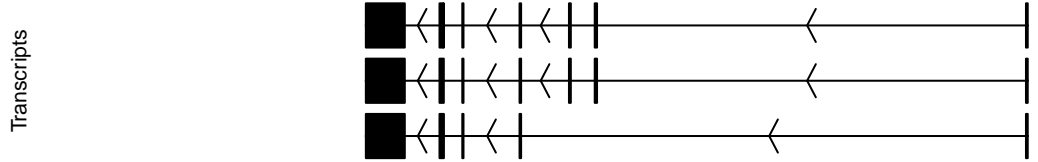



# 9-135133263-rs612169

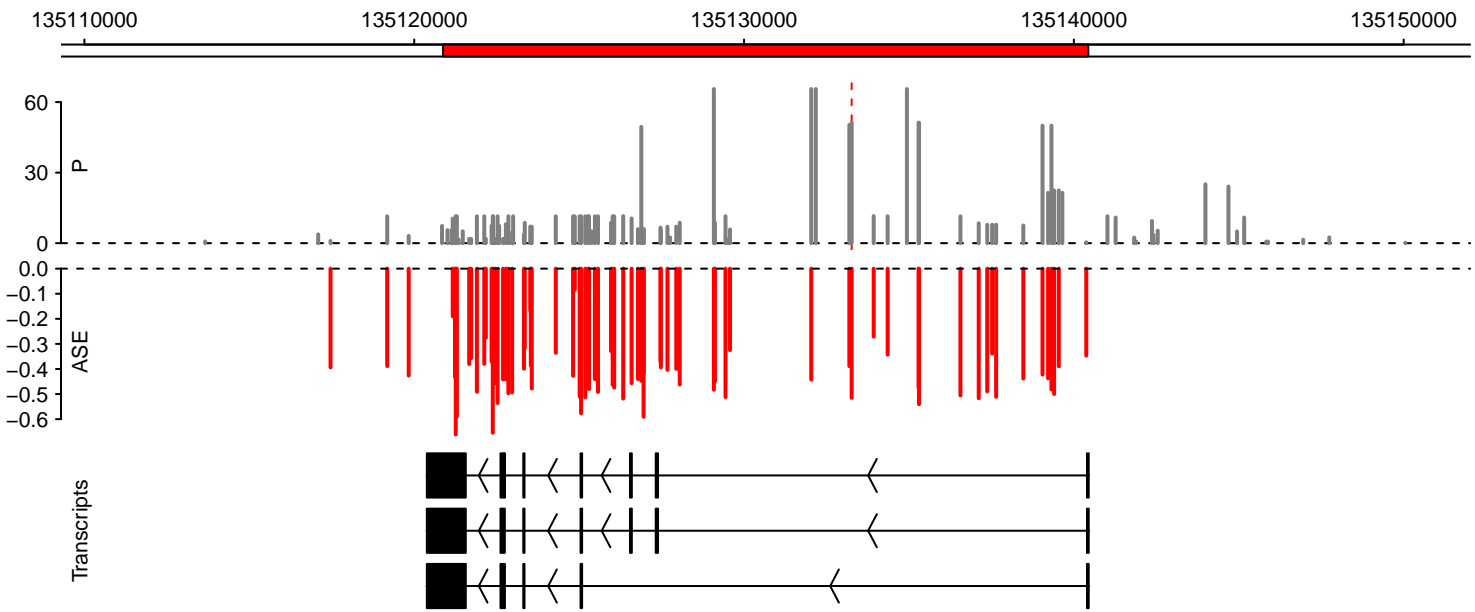

# 9-135139050-rs505922

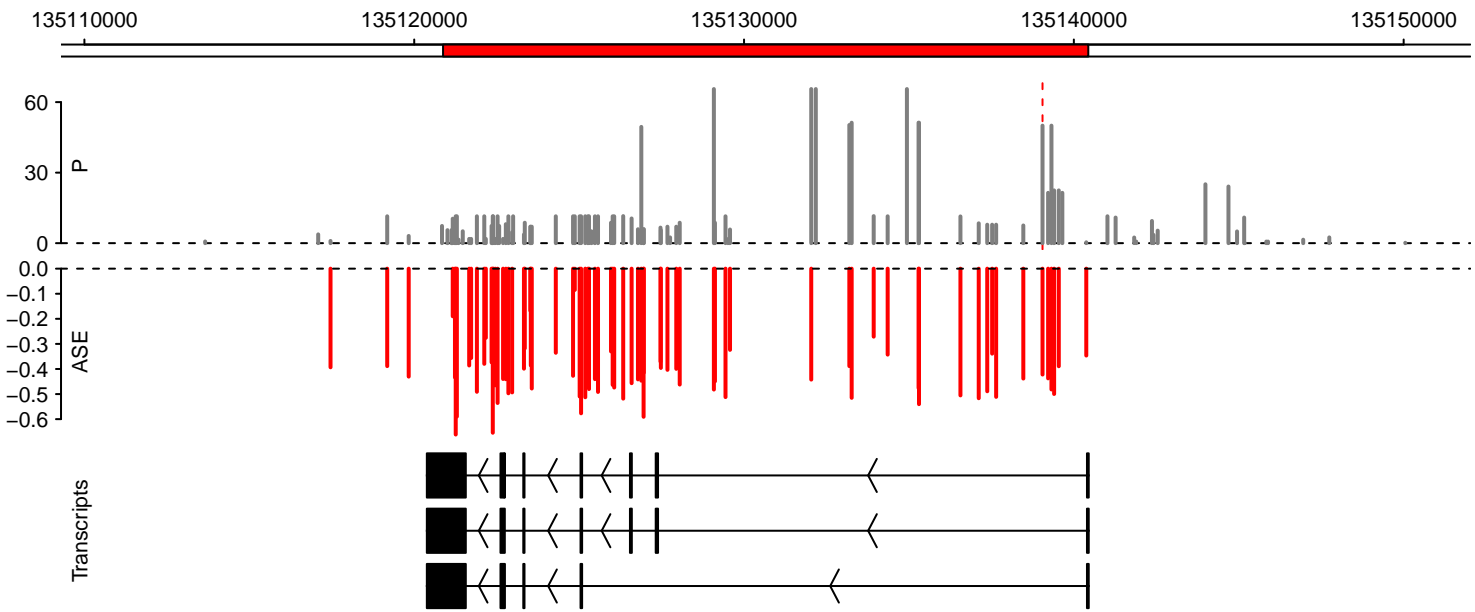

## 9-135139220-rs507666

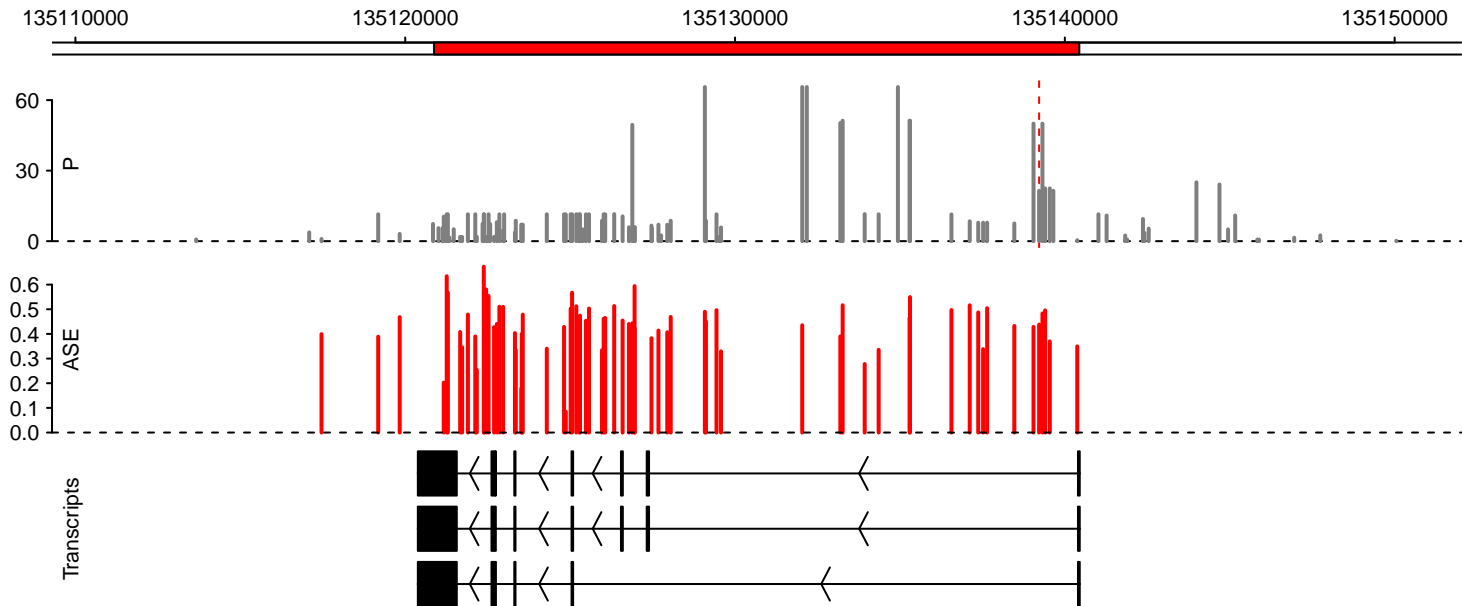

# 9-135143989-rs579459

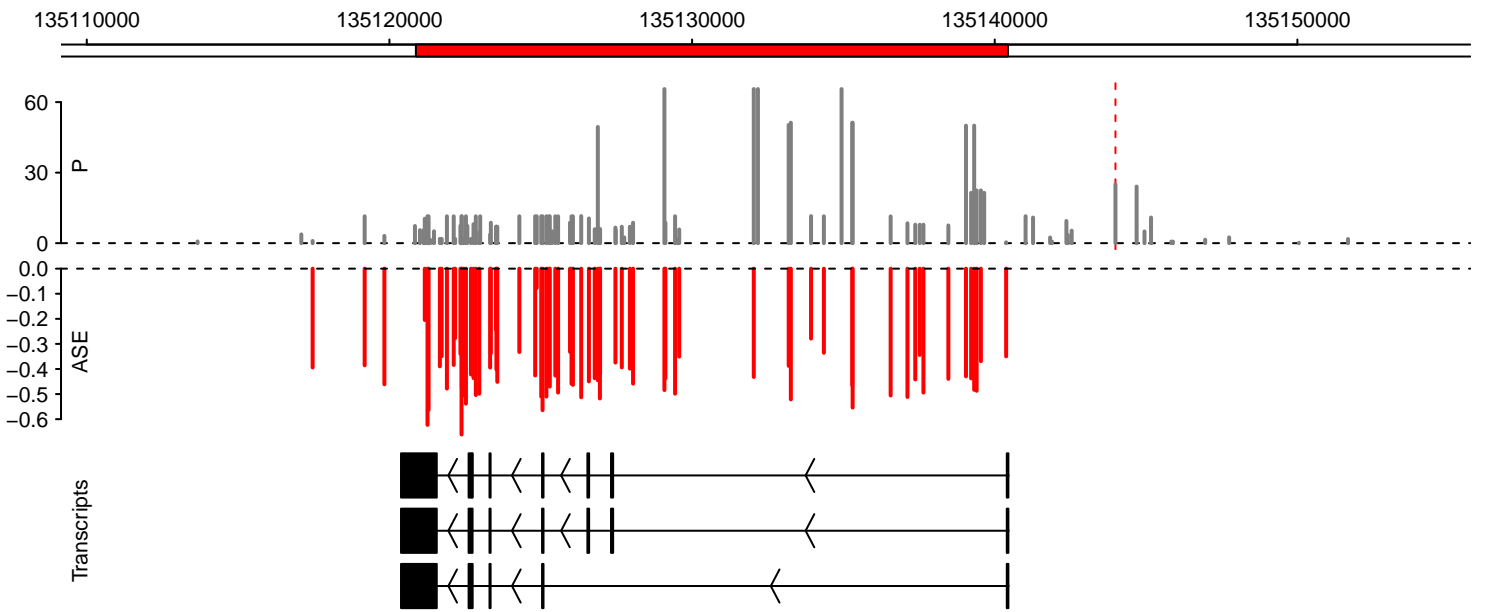

# 9-135144688-rs495828

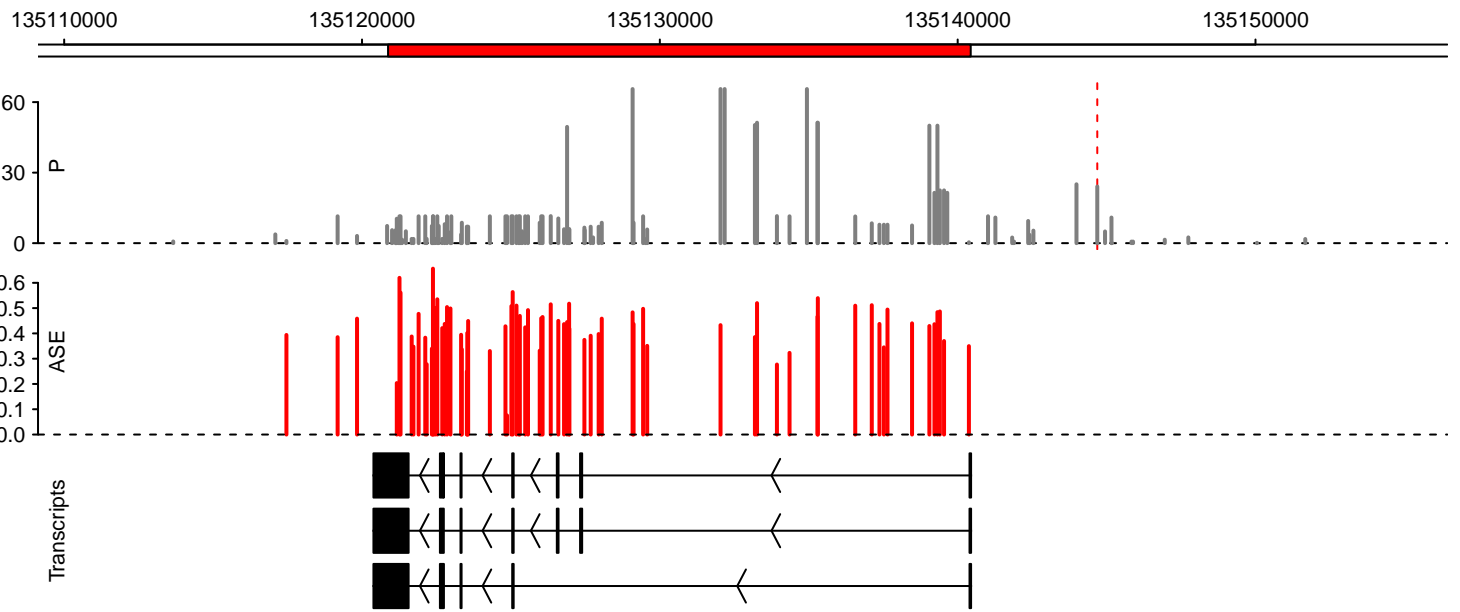

# 15-43419160-rs1153862

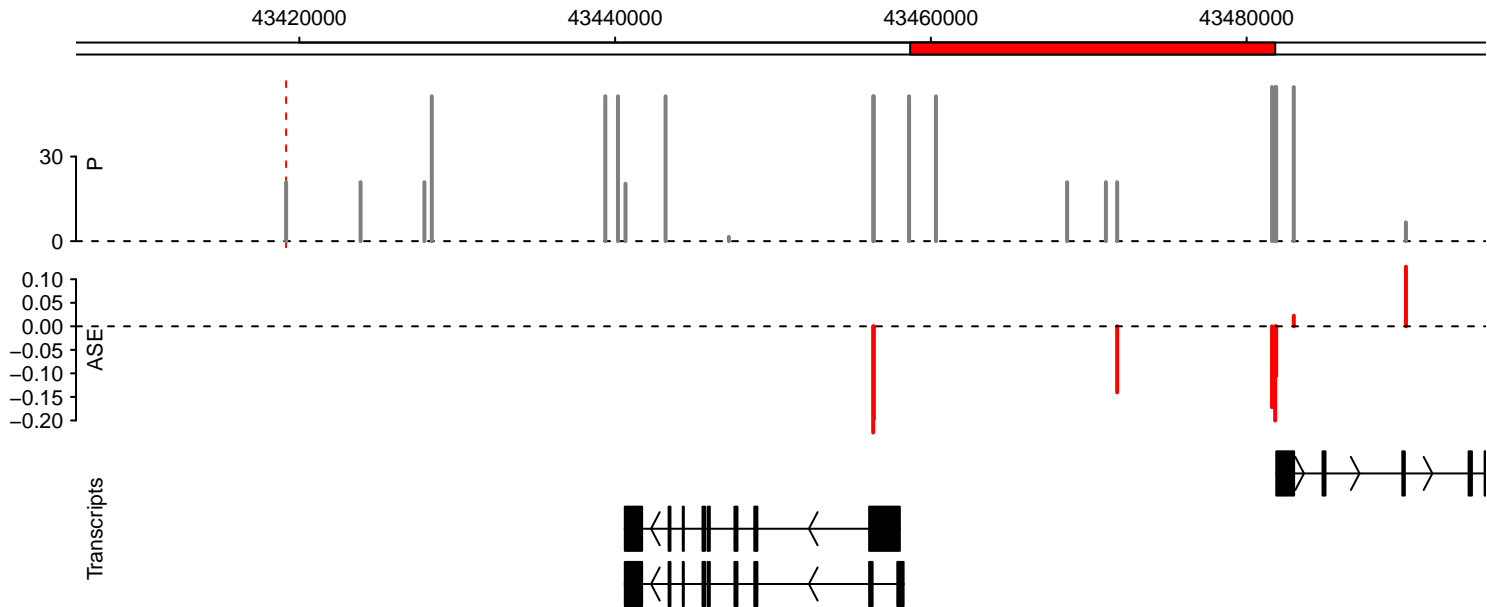

## 15-83232148-rs12442557

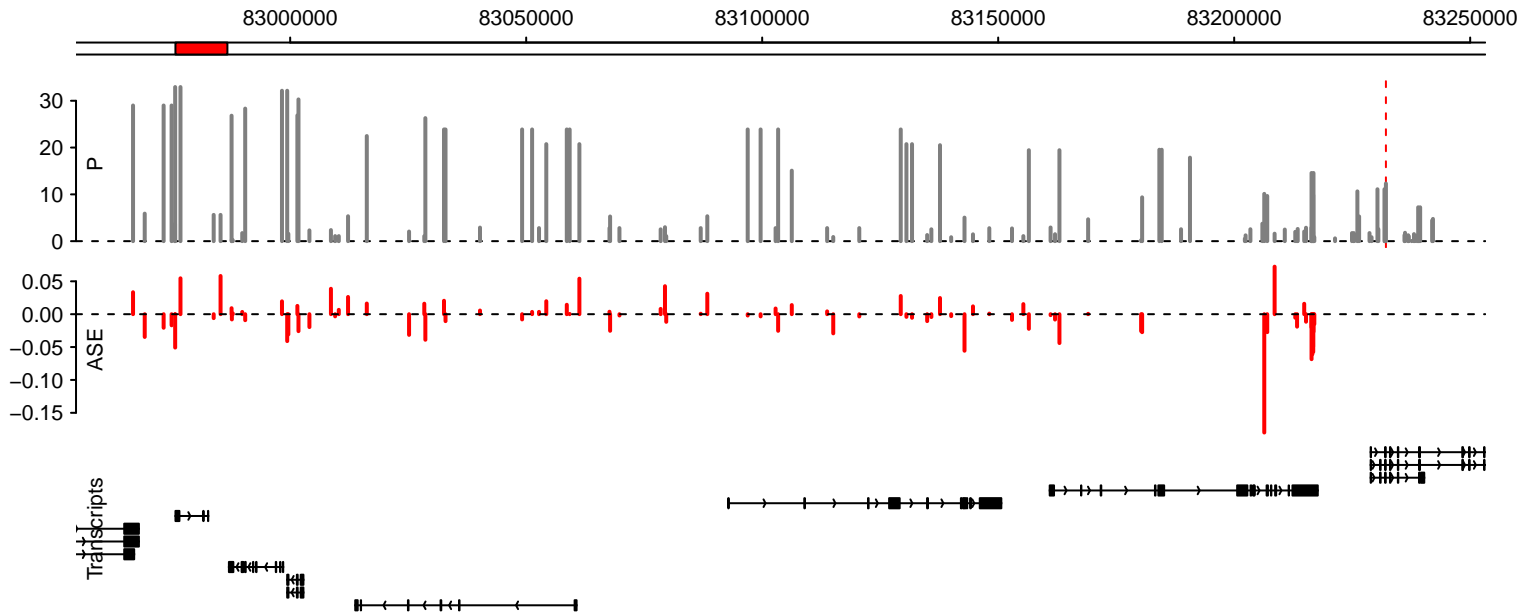

# 17-26271841-rs3760318

26050000                      26100000                      26150000                      26200000                      26250000

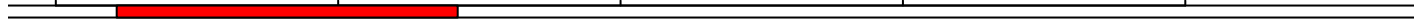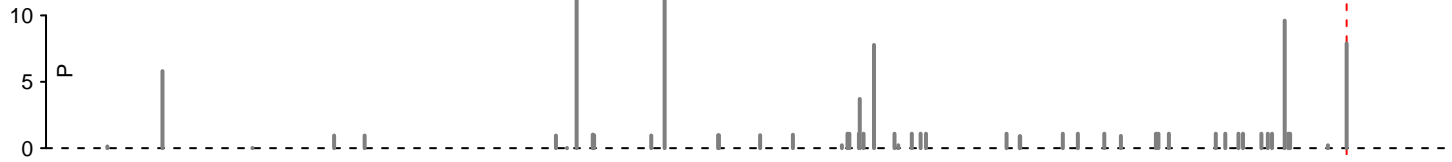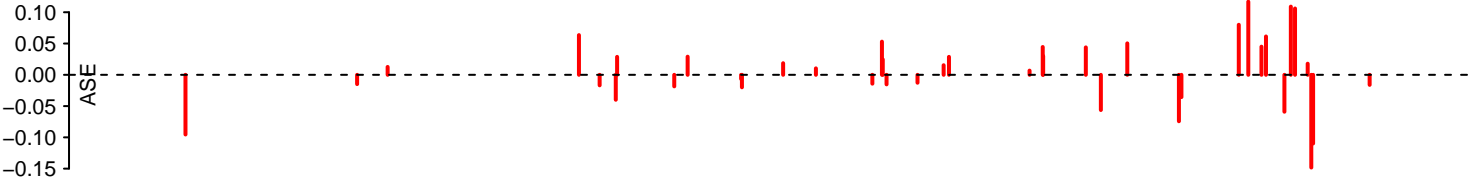

Transcripts

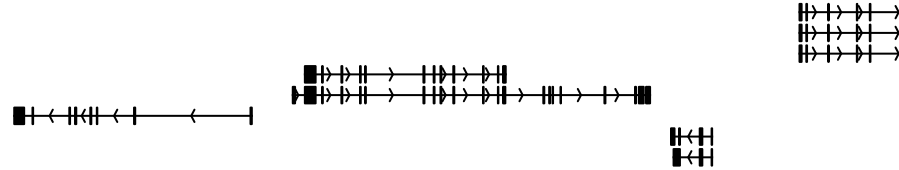

Supplement: pone.0102612.s004.pdf [file pone.0102612.s004.pdf]
