# Supplementary material for: Single Nucleotide Polymorphisms with Cis-Regulatory Effects on Long Non-Coding Transcripts in Human Primary Monocytes
Source: PubMed Central journal article supplement (PMC4099216; doi:10.1371/journal.pone.0102612), 2014-07-15

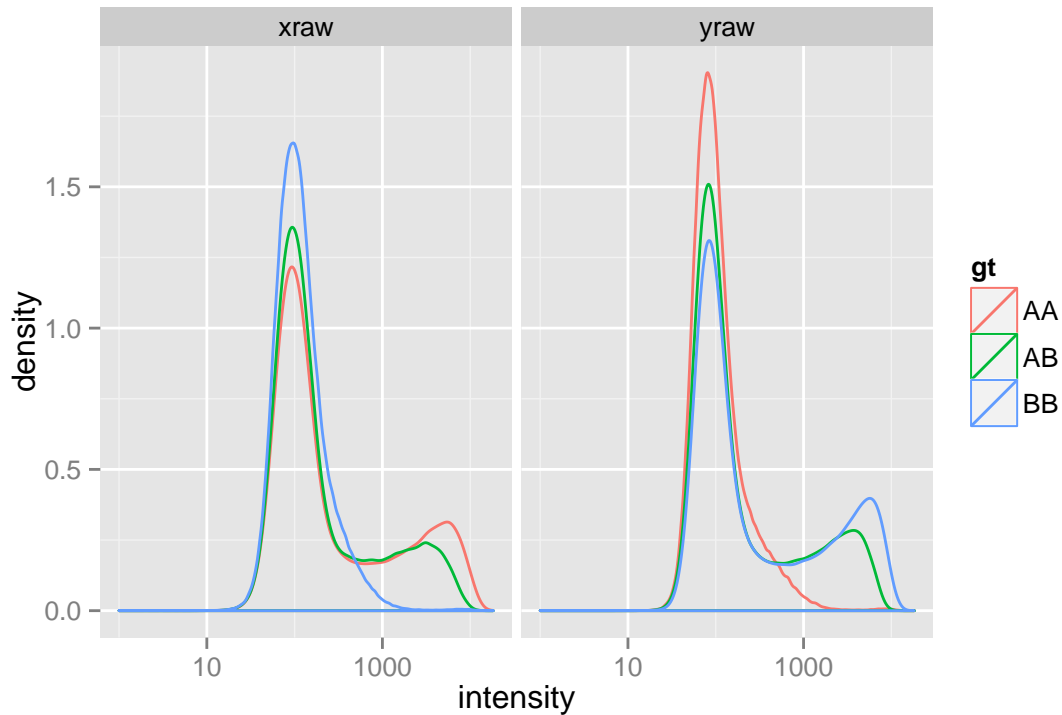

Supplement: pone.0102612.s002.pdf [file pone.0102612.s002.pdf]
